# Supplementary material for: Female Sexual Dysfunction in Women with Non-Malignant Cervical Diseases: A Study from an Urban Chinese Sample
Source: PLoS One. 2015 Oct 16;10(10):e0141004. doi: 10.1371/journal.pone.0141004 (PMC4608565; doi:10.1371/journal.pone.0141004)
Supplement: S1 Data — (XLSX) [file pone.0141004.s001.xlsx]

## Sheet: Sheet1
Age	Marriage （1=Married,2=Unmarried but have a regular partner,3=Divorced but have a regular partner)	pregnant or not(1=yes,2=no)	Production history(1=have not given birth,2=Natural,3=Dystocia,4=Cesarean section)	Contraception(1= Intrauterine device,2=Condom,3=Oral contraceptives,4=Ligation of fallopian tubes,5=Others)	breastfeeding or not (1=yes,2=no)	Health status (1=Healthy,2=Average,3=Poor)	Health status of partner (1=Healthy,2=Average,3=Poor)	Sexual status of partner(1=good,2=Average)	History of non-malignant cervical disease(1=unknown,2=Yes,3=No)	cervicitis(0=no,1=yes)	Cervical polyps(0=no,1=yes)	CINⅠ(0=no,1=yes)	CINⅡ(0=no,1=yes)	CINⅢ(0=no,1=yes)	CIN(0=no,1=yes)	Nabothian cyst(0=no,1=yes)	cervical hypertrophy(0=no,1=yes)	Cervical laceration(0=no,1=yes)	cervical submucosal uterine fibroids(0=no,1=yes)	cervical genital warts(0=no,1=yes)	Cervical lesion(0=no,1=yes)	Desire1	Desire2	Arousal3	Arousal4	Arousal5	Arousal6	Lubrication7	Lubrication8	Lubrication9	Lubrication10	Orgasm11	Orgsm12	Orgasm13	Satisfaction14	Satisfaction15	Satisfaction16	Pain17	Pain18	Pain19
37	1	2	2	1	2	2	1	1	1	0	0	0	0	0	0	0	0	0	0	0	0	3	3	3	3	3	3	3	3	3	3	2	3	3	2	3	3	3	3	3
44	1	2	2	2	2	2	2	2	1	0	0	0	0	0	0	0	0	0	0	0	0	3	3	4	4	3	4	4	4	2	4	4	4	3	3	4	4	4	4	3
29	1	2	1	2	2	1	1	1	3	0	0	0	0	0	0	0	0	0	0	0	0	3	3	5	5	4	4	5	5	4	5	4	5	4	4	4	4	4	4	5
41	1	2	2	1	2	2	1	1	1	0	0	0	0	0	0	0	0	0	0	0	0	2	3	2	3	3	3	3	5	5	5	5	5	4	4	4	4	5	5	5
39	1	2	2	2	2	1	1	2	3	0	0	0	0	0	0	0	0	0	0	0	0	3	3	2	3	3	4	3	4	5	4	2	4	3	3	3	3	5	5	5
42	1	2	2	1	2	2	1	1	3	0	0	0	0	0	0	0	0	0	0	0	0	4	3	3	3	3	3	4	5	3	5	3	5	5	5	5	5	4	4	4
33	1	2	4	2	2	1	1	1	1	0	0	0	0	0	0	0	0	0	0	0	0	2	4	4	4	5	5	4	4	4	2	5	5	5	5	5	5	5	5	5
43	1	2	2	1	2	2	1	2	3	0	0	0	0	0	0	0	0	0	0	0	0	4	3	2	3	3	2	3	3	2	4	4	4	3	3	4	4	3	4	3
46	1	2	2	1	2	1	1	2	3	0	0	0	0	0	0	0	0	0	0	0	0	3	3	2	2	3	3	2	3	2	3	2	4	2	2	2	2	4	4	4
30	1	2	2	2	2	2	1	2	1	0	0	0	0	0	0	0	0	0	0	0	0	2	3	3	3	3	3	3	3	3	3	3	3	3	3	3	3	3	3	3
47	3	2	2	1	2	1	1	2	3	0	0	0	0	0	0	0	0	0	0	0	0	3	3	2	3	3	2	3	3	4	4	2	4	4	4	4	4	4	4	4
42	1	2	4	2	2	1	1	1	1	0	0	0	0	0	0	0	0	0	0	0	0	4	4	4	4	4	4	4	2	4	2	3	4	4	4	4	4	5	5	5
53	1	2	4	1	2	1	1	1	1	0	0	0	0	0	0	0	0	0	0	0	0	3	3	3	4	3	3	2	4	3	4	4	3	5	5	5	5	4	4	5
40	1	2	4	1	2	2	1	2	3	0	0	0	0	0	0	0	0	0	0	0	0	3	3	3	3	3	3	4	5	3	5	4	5	3	4	4	4	3	3	3
38	1	2	4	5	2	1	1	2	2	0	0	0	0	0	0	0	0	0	0	0	0	2	2	3	3	3	3	2	3	4	5	3	5	3	2	4	4	4	4	4
33	1	2	2	2	2	2	2	2	1	0	0	0	0	0	0	0	0	0	0	0	0	2	2	2	3	3	2	2	3	2	4	1	3	2	4	4	4	2	4	3
31	1	2	1	2	2	1	1	1	3	0	0	0	0	0	0	0	0	0	0	0	0	3	3	5	4	4	4	5	5	4	5	4	5	5	5	5	3	2	3	2
30	1	2	4	2	2	2	2	1	2	0	0	0	0	0	0	0	0	0	0	0	0	3	3	4	4	4	4	3	4	5	5	4	5	5	5	5	4	4	4	4
43	1	2	2	5	2	1	1	1	3	0	0	0	0	0	0	0	0	0	0	0	0	4	4	4	4	4	4	4	5	5	5	4	5	4	4	4	4	5	5	5
40	1	2	2	1	2	2	1	1	3	0	0	0	0	0	0	0	0	0	0	0	0	3	2	3	3	3	2	3	3	3	3	2	4	3	4	4	4	4	4	4
37	1	2	1	2	2	1	1	1	1	0	0	0	0	0	0	0	0	0	0	0	0	4	4	4	4	4	4	4	5	4	5	4	5	5	5	5	5	5	5	5
42	1	2	2	2	2	3	1	2	1	0	0	0	0	0	0	0	0	0	0	0	0	2	2	2	2	2	2	3	5	3	5	4	5	3	3	2	2	4	4	4
35	1	2	4	1	2	1	2	1	3	0	0	0	0	0	0	0	0	0	0	0	0	2	3	3	3	3	3	4	5	2	5	2	4	3	4	4	4	3	3	3
37	1	2	2	2	2	2	1	2	3	0	0	0	0	0	0	0	0	0	0	0	0	2	3	2	3	3	4	4	5	5	5	5	5	4	4	4	4	4	3	3
43	1	2	2	1	2	1	1	1	1	0	0	0	0	0	0	0	0	0	0	0	0	2	3	2	3	3	2	3	5	3	5	2	5	4	4	3	4	5	5	4
37	1	2	2	1	2	2	1	1	3	0	0	0	0	0	0	0	0	0	0	0	0	2	3	2	3	3	3	4	5	4	5	4	5	4	4	4	4	4	5	5
38	1	2	4	2	2	2	1	2	2	0	0	0	0	0	0	0	0	0	0	0	0	5	4	5	3	3	5	4	5	5	5	5	5	4	4	4	4	5	5	5
23	2	2	1	2	2	1	2	2	1	0	0	0	0	0	0	0	0	0	0	0	0	3	4	3	3	3	3	4	5	4	5	4	5	4	4	4	3	4	4	4
30	1	2	2	2	2	1	1	1	1	0	0	0	0	0	0	0	0	0	0	0	0	3	3	3	3	3	3	3	4	3	5	3	5	3	3	4	4	4	4	4
29	1	2	4	2	2	2	1	1	1	0	0	0	0	0	0	0	0	0	0	0	0	2	2	2	3	3	3	3	4	3	3	4	5	4	4	3	4	2	4	4
44	1	2	2	2	2	1	1	1	3	0	0	0	0	0	0	0	0	0	0	0	0	3	3	3	3	3	4	4	5	3	5	2	5	4	4	4	3	5	5	5
29	1	2	1	2	2	2	1	1	3	0	0	0	0	0	0	0	0	0	0	0	0	3	3	3	3	3	3	3	5	3	5	3	4	4	5	5	4	3	4	4
32	1	2	1	5	2	1	1	1	1	0	0	0	0	0	0	0	0	0	0	0	0	3	3	3	3	3	3	3	4	3	4	2	4	4	4	4	4	3	3	3
39	1	2	3	5	2	1	1	2	3	0	0	0	0	0	0	0	0	0	0	0	0	3	3	2	3	3	3	2	4	2	2	4	3	4	4	4	4	4	4	4
37	1	2	2	4	2	2	1	1	1	0	0	0	0	0	0	0	0	0	0	0	0	2	2	2	2	3	2	3	4	2	4	3	5	4	4	3	3	4	4	4
35	1	2	2	1	2	1	1	1	3	0	0	0	0	0	0	0	0	0	0	0	0	2	4	2	3	2	2	2	4	2	4	1	4	3	3	3	3	4	4	4
39	1	2	2	1	2	1	1	1	3	0	0	0	0	0	0	0	0	0	0	0	0	2	3	3	3	3	3	3	4	3	3	3	3	3	4	4	4	4	4	4
44	1	2	2	2	2	1	1	2	1	0	0	0	0	0	0	0	0	0	0	0	0	2	3	2	2	3	2	2	4	1	2	2	3	4	4	4	4	2	2	3
27	1	2	1	2	2	1	1	1	3	0	0	0	0	0	0	0	0	0	0	0	0	4	4	4	4	4	4	4	5	4	5	3	4	4	5	5	4	2	5	4
24	1	2	1	2	2	2	1	1	2	0	0	0	0	0	0	0	0	0	0	0	0	2	3	3	3	3	3	3	4	3	4	3	4	3	4	4	4	4	4	4
35	1	2	1	5	2	3	1	1	1	0	0	0	0	0	0	0	0	0	0	0	0	4	4	4	4	4	4	4	4	4	5	5	5	4	5	5	4	4	5	4
32	1	2	1	2	2	2	2	2	3	0	0	0	0	0	0	0	0	0	0	0	0	3	3	3	3	4	4	4	5	4	5	3	4	3	3	3	3	3	3	3
39	1	2	2	1	2	1	1	1	1	0	0	0	0	0	0	0	0	0	0	0	0	3	4	4	3	4	4	4	4	4	5	4	5	4	4	4	4	4	4	4
41	1	2	2	5	2	2	2	2	1	0	0	0	0	0	0	0	0	0	0	0	0	2	2	2	2	3	2	3	4	2	3	2	4	3	4	4	4	4	4	5
35	1	2	1	2	2	2	2	1	3	0	0	0	0	0	0	0	0	0	0	0	0	2	1	1	1	1	1	1	5	1	5	1	5	4	4	4	4	5	5	5
29	1	2	2	2	2	2	2	2	1	0	0	0	0	0	0	0	0	0	0	0	0	2	3	2	2	3	2	2	3	2	3	2	4	2	3	4	3	3	4	3
42	1	2	2	1	2	1	1	2	2	0	0	0	0	0	0	0	0	0	0	0	0	3	2	2	2	3	2	3	4	2	3	2	3	3	2	3	3	3	3	3
34	1	2	2	1	2	2	1	1	1	0	0	0	0	0	0	0	0	0	0	0	0	2	2	5	4	3	4	4	5	3	5	5	5	4	4	4	4	4	4	4
37	1	2	2	5	2	1	1	2	3	0	0	0	0	0	0	0	0	0	0	0	0	2	2	2	3	2	2	4	4	3	4	2	3	3	3	3	3	3	2	3
48	1	2	2	4	2	1	1	2	1	0	0	0	0	0	0	0	0	0	0	0	0	2	2	4	3	3	2	3	5	3	5	5	5	4	4	4	4	4	4	4
45	1	2	2	2	2	1	1	1	1	0	0	0	0	0	0	0	0	0	0	0	0	4	3	4	3	3	4	3	5	4	5	4	5	4	4	4	4	4	5	4
32	1	2	4	2	2	2	2	2	3	0	0	0	0	0	0	0	0	0	0	0	0	2	3	2	2	3	2	4	5	4	5	5	5	5	5	4	4	4	5	5
42	1	2	2	1	2	1	1	2	1	0	0	0	0	0	0	0	0	0	0	0	0	2	2	2	2	2	2	4	5	5	5	1	2	2	2	4	4	5	5	5
36	1	2	2	2	2	1	1	1	3	0	0	0	0	0	0	0	0	0	0	0	0	2	3	4	4	4	4	4	5	4	5	5	5	5	5	5	4	5	5	5
48	1	2	2	1	2	2	1	1	1	0	0	0	0	0	0	0	0	0	0	0	0	4	3	3	3	3	4	2	4	2	4	4	5	4	4	4	4	4	4	4
32	1	2	4	2	2	1	1	1	3	0	0	0	0	0	0	0	0	0	0	0	0	2	3	3	4	3	3	4	5	4	5	3	4	4	4	5	5	4	4	4
40	1	2	2	1	2	1	1	1	1	0	0	0	0	0	0	0	0	0	0	0	0	2	3	3	3	3	3	3	4	3	5	3	5	4	4	4	4	4	4	3
33	1	2	2	1	2	2	1	1	3	0	0	0	0	0	0	0	0	0	0	0	0	3	3	3	3	3	3	4	5	3	5	3	5	4	5	4	4	5	5	5
45	1	2	2	2	2	2	2	2	1	0	0	0	0	0	0	0	0	0	0	0	0	3	3	3	3	3	3	3	5	3	5	4	5	4	5	5	5	5	5	5
32	2	2	1	2	2	2	2	2	3	0	0	0	0	0	0	0	0	0	0	0	0	1	1	4	3	3	3	5	5	2	4	3	4	3	4	2	3	2	3	3
25	1	2	2	2	2	2	2	2	2	0	0	0	0	0	0	0	0	0	0	0	0	4	3	4	3	3	4	5	5	5	5	4	5	4	4	4	4	5	5	5
37	1	2	4	2	2	2	2	2	2	0	0	0	0	0	0	0	0	0	0	0	0	4	4	4	4	3	4	3	5	4	5	4	3	5	4	4	4	4	4	4
24	2	2	1	2	2	2	2	2	3	0	0	0	0	0	0	0	0	0	0	0	0	3	4	4	4	4	4	4	4	5	5	2	3	4	4	4	4	3	3	3
45	1	2	4	5	2	1	1	1	3	0	0	0	0	0	0	0	0	0	0	0	0	2	2	3	3	3	4	2	3	2	4	4	5	3	4	4	4	3	4	3
48	1	2	2	1	2	2	1	1	1	0	0	0	0	0	0	0	0	0	0	0	0	2	3	5	3	3	4	4	5	5	5	5	5	5	5	5	5	5	5	5
34	1	2	2	2	2	3	2	2	3	0	0	0	0	0	0	0	0	0	0	0	0	2	2	2	2	2	2	3	4	3	3	2	3	3	3	3	3	4	3	3
44	1	2	2	5	2	1	1	1	1	0	0	0	0	0	0	0	0	0	0	0	0	4	4	4	4	4	4	5	5	5	5	4	5	4	5	5	4	5	5	5
38	1	2	2	1	2	1	1	1	3	0	0	0	0	0	0	0	0	0	0	0	0	2	3	3	3	3	3	3	5	3	4	2	4	3	4	4	4	4	4	3
48	1	2	2	2	2	2	2	2	1	0	0	0	0	0	0	0	0	0	0	0	0	2	3	3	3	3	3	3	4	4	5	4	5	4	4	4	4	4	4	4
33	1	2	2	1	2	2	1	2	3	0	0	0	0	0	0	0	0	0	0	0	0	2	2	2	2	1	2	2	4	2	4	1	4	2	2	2	2	4	4	4
29	1	2	2	2	2	1	1	1	1	0	0	0	0	0	0	0	0	0	0	0	0	2	2	2	3	3	3	3	5	3	5	3	3	3	3	3	3	3	3	3
46	1	2	4	1	2	2	1	2	3	0	0	0	0	0	0	0	0	0	0	0	0	2	2	3	3	3	3	3	5	2	5	3	4	4	4	4	4	5	5	4
33	1	2	2	5	2	1	1	1	1	0	0	0	0	0	0	0	0	0	0	0	0	2	2	2	3	3	3	5	5	5	5	2	3	3	5	5	5	4	4	4
32	1	2	1	2	2	1	1	1	3	0	0	0	0	0	0	0	0	0	0	0	0	2	3	4	3	3	4	4	4	4	5	4	5	4	4	3	3	5	5	5
31	1	2	4	5	2	2	2	2	3	0	0	0	0	0	0	0	0	0	0	0	0	2	3	5	3	3	4	5	5	5	5	4	4	4	4	4	4	4	4	4
44	1	2	2	1	2	2	2	2	1	0	0	0	0	0	0	0	0	0	0	0	0	2	2	2	3	3	3	3	3	3	3	3	3	3	3	3	3	3	3	3
23	2	2	1	2	2	1	1	1	1	0	0	0	0	0	0	0	0	0	0	0	0	2	2	2	2	1	1	1	5	1	5	1	5	1	1	1	1	5	5	5
38	1	2	2	1	2	1	1	1	3	0	0	0	0	0	0	0	0	0	0	0	0	3	4	4	4	4	4	4	5	4	5	3	5	4	4	4	4	4	5	4
32	1	2	4	1	2	2	2	2	2	0	0	0	0	0	0	0	0	0	0	0	0	3	3	3	3	4	4	4	2	4	4	4	5	4	4	4	4	4	4	4
24	2	2	1	2	2	3	2	2	3	0	0	0	0	0	0	0	0	0	0	0	0	2	3	2	3	3	3	2	3	2	5	1	4	2	2	2	2	4	4	4
41	1	2	2	1	2	2	1	2	3	0	0	0	0	0	0	0	0	0	0	0	0	1	2	2	2	2	2	2	4	2	3	2	4	2	2	3	3	3	3	3
27	1	2	1	2	2	1	1	1	3	0	0	0	0	0	0	0	0	0	0	0	0	3	3	3	3	3	3	4	5	4	5	4	4	4	4	4	4	3	3	3
45	1	2	2	4	2	2	1	1	3	0	0	0	0	0	0	0	0	0	0	0	0	2	2	2	2	2	2	2	4	2	4	2	4	3	3	3	3	4	4	4
29	1	2	4	1	2	1	1	1	2	0	0	0	0	0	0	0	0	0	0	0	0	3	3	3	3	3	3	3	5	2	4	2	3	3	4	4	4	2	5	4
33	1	2	2	1	2	1	1	1	3	0	0	0	0	0	0	0	0	0	0	0	0	1	1	1	1	3	2	4	3	4	5	4	5	4	4	4	4	4	4	3
35	1	2	2	5	2	2	2	2	3	0	0	0	0	0	0	0	0	0	0	0	0	2	2	2	2	2	2	4	5	5	5	2	4	2	4	4	4	4	5	5
38	1	2	4	2	2	1	1	1	3	0	0	0	0	0	0	0	0	0	0	0	0	2	3	2	3	3	2	4	5	4	5	4	4	4	4	4	4	2	2	3
35	1	2	4	3	2	1	1	1	2	0	0	0	0	0	0	0	0	0	0	0	0	4	4	5	4	5	4	5	5	5	5	4	5	5	5	5	5	5	4	4
35	1	2	2	1	2	1	1	1	3	0	0	0	0	0	0	0	0	0	0	0	0	2	3	3	3	3	3	2	4	3	3	2	3	4	5	3	3	5	5	5
22	1	2	1	2	2	1	1	1	3	0	0	0	0	0	0	0	0	0	0	0	0	2	3	2	3	3	3	3	4	4	4	4	5	4	4	4	4	4	4	4
31	1	2	4	1	2	1	1	1	1	0	0	0	0	0	0	0	0	0	0	0	0	3	3	3	3	3	4	5	5	5	5	4	5	4	4	4	5	5	5	5
45	1	2	2	4	2	1	1	1	1	0	0	0	0	0	0	0	0	0	0	0	0	2	2	2	2	3	2	5	4	5	5	4	5	3	3	3	3	3	4	3
25	1	2	1	2	2	1	1	1	3	0	0	0	0	0	0	0	0	0	0	0	0	5	4	4	4	4	4	4	4	3	5	2	3	2	4	4	3	4	4	4
39	1	2	2	1	2	1	2	2	1	0	0	0	0	0	0	0	0	0	0	0	0	3	4	4	4	3	5	4	5	4	4	4	5	4	4	4	4	4	5	5
40	1	2	2	1	2	2	2	2	3	0	0	0	0	0	0	0	0	0	0	0	0	3	3	3	3	3	3	4	5	3	3	5	4	4	4	5	4	3	4	4
46	1	2	2	5	2	2	2	2	3	0	0	0	0	0	0	0	0	0	0	0	0	4	4	3	3	3	3	3	4	4	4	4	3	4	4	3	3	5	5	4
27	1	2	2	1	2	1	1	1	3	0	0	0	0	0	0	0	0	0	0	0	0	3	3	4	3	3	4	2	3	2	4	3	4	4	4	4	4	4	4	4
47	1	2	2	5	2	2	2	2	1	0	0	0	0	0	0	0	0	0	0	0	0	2	2	2	2	2	3	3	4	2	4	2	3	2	4	3	3	3	2	3
41	1	2	2	1	2	1	1	1	1	0	0	0	0	0	0	0	0	0	0	0	0	2	2	2	3	3	4	4	5	4	5	3	5	4	4	4	4	4	4	5
35	1	2	4	1	2	2	2	2	3	0	0	0	0	0	0	0	0	0	0	0	0	3	3	4	3	3	4	4	3	3	4	3	4	3	3	3	4	3	3	3
38	1	2	4	1	2	2	2	2	3	0	0	0	0	0	0	0	0	0	0	0	0	2	2	3	3	3	4	3	5	3	4	4	4	4	4	4	4	4	4	4
37	1	2	2	1	2	3	2	2	1	0	0	0	0	0	0	0	0	0	0	0	0	2	2	1	2	2	2	2	4	2	4	3	3	4	2	2	3	4	3	3
33	1	2	2	2	2	1	1	2	1	0	0	0	0	0	0	0	0	0	0	0	0	3	2	2	2	3	2	3	3	3	4	4	3	3	3	4	4	3	3	3
48	1	2	4	2	2	2	2	2	3	0	0	0	0	0	0	0	0	0	0	0	0	4	4	3	3	3	4	3	5	4	5	4	5	4	4	4	4	3	3	3
37	1	2	2	2	2	1	1	1	3	0	0	0	0	0	0	0	0	0	0	0	0	3	3	3	3	3	4	4	5	4	5	3	5	4	5	5	5	4	4	4
52	1	2	2	2	2	2	1	1	3	0	0	0	0	0	0	0	0	0	0	0	0	4	3	3	3	3	4	3	4	3	3	4	4	3	3	4	4	4	3	4
44	1	2	2	1	2	1	2	2	3	0	0	0	0	0	0	0	0	0	0	0	0	3	3	3	3	3	3	4	4	3	4	4	5	4	4	4	4	4	4	4
42	1	2	2	1	2	2	1	1	3	0	0	0	0	0	0	0	0	0	0	0	0	3	3	3	3	5	4	3	4	4	3	4	4	4	4	4	4	5	5	4
55	1	2	2	1	2	1	1	1	1	0	0	0	0	0	0	0	0	0	0	0	0	2	3	2	3	3	3	1	5	5	4	3	3	3	3	4	4	4	4	3
26	1	2	2	2	2	2	1	1	3	0	0	0	0	0	0	0	0	0	0	0	0	2	3	4	3	3	3	4	4	5	5	4	5	4	4	3	3	4	4	4
52	1	2	2	4	2	1	2	2	1	0	0	0	0	0	0	0	0	0	0	0	0	3	3	4	3	3	3	4	4	4	4	3	4	3	4	4	4	5	5	4
45	1	2	2	5	2	3	1	1	3	0	0	0	0	0	0	0	0	0	0	0	0	1	2	2	2	2	2	2	3	3	2	3	3	4	4	4	4	2	2	3
33	1	2	2	1	2	1	1	1	1	0	0	0	0	0	0	0	0	0	0	0	0	2	3	3	3	3	3	4	5	4	5	3	4	3	3	4	4	3	4	4
31	1	2	2	2	2	1	1	1	3	0	0	0	0	0	0	0	0	0	0	0	0	3	3	3	3	3	3	3	4	4	5	4	5	4	4	4	4	5	5	5
28	1	2	2	1	2	1	1	1	3	0	0	0	0	0	0	0	0	0	0	0	0	3	3	3	3	3	3	3	5	2	5	3	5	3	3	4	3	4	4	4
48	1	2	4	4	2	1	1	1	3	0	0	0	0	0	0	0	0	0	0	0	0	2	2	2	3	3	4	2	3	2	3	4	3	4	4	4	4	3	3	3
27	1	2	2	1	2	1	1	2	3	0	0	0	0	0	0	0	0	0	0	0	0	3	3	3	3	3	3	3	5	3	5	3	5	4	4	4	4	4	4	4
42	1	2	4	1	2	2	1	2	3	0	0	0	0	0	0	0	0	0	0	0	0	2	2	3	3	3	2	2	4	2	4	2	4	2	2	2	2	4	4	4
42	1	2	2	1	2	3	1	1	3	0	0	0	0	0	0	0	0	0	0	0	0	2	2	2	2	3	2	4	3	4	5	4	5	4	4	4	4	4	4	4
22	1	2	2	2	2	2	2	1	3	0	0	0	0	0	0	0	0	0	0	0	0	2	3	3	3	3	3	3	4	3	4	3	4	4	4	4	4	2	3	3
23	2	2	1	2	2	2	1	1	3	0	0	0	0	0	0	0	0	0	0	0	0	3	3	4	3	4	4	4	5	4	5	3	5	4	4	4	4	4	4	4
36	1	2	4	1	2	1	1	1	2	0	0	0	0	0	0	0	0	0	0	0	0	2	3	2	3	3	3	4	3	3	4	4	3	4	4	5	5	4	4	4
35	1	2	2	1	2	1	1	1	3	0	0	0	0	0	0	0	0	0	0	0	0	3	3	4	4	3	3	4	5	4	5	4	5	4	4	4	4	5	5	5
44	1	2	2	1	2	2	1	2	3	0	0	0	0	0	0	0	0	0	0	0	0	3	3	3	3	3	2	2	4	2	4	3	3	4	4	4	4	4	4	3
30	1	2	4	5	2	1	1	1	3	0	0	0	0	0	0	0	0	0	0	0	0	2	2	3	3	3	3	3	4	2	3	2	4	3	4	4	4	4	5	4
41	1	2	2	1	2	1	1	1	2	0	0	0	0	0	0	0	0	0	0	0	0	2	2	3	3	3	3	4	5	4	3	2	5	4	4	4	4	4	4	4
26	2	2	1	2	2	1	1	1	3	0	0	0	0	0	0	0	0	0	0	0	0	2	3	2	3	4	2	5	5	5	5	2	5	3	5	4	4	5	4	5
36	1	2	4	1	2	1	1	1	3	0	0	0	0	0	0	0	0	0	0	0	0	2	2	3	3	3	3	3	4	3	3	2	3	4	4	5	4	4	4	5
48	1	2	4	1	2	1	1	1	3	0	0	0	0	0	0	0	0	0	0	0	0	2	3	2	3	3	3	4	5	4	5	4	5	4	4	4	4	5	5	5
30	1	2	1	5	2	1	1	1	3	0	0	0	0	0	0	0	0	0	0	0	0	2	2	2	3	2	2	2	5	2	5	2	5	3	3	4	3	4	4	3
42	1	2	2	1	2	1	1	1	3	0	0	0	0	0	0	0	0	0	0	0	0	2	3	2	3	3	3	2	4	3	4	5	5	4	4	4	4	4	4	3
41	1	2	2	1	2	1	2	2	3	0	0	0	0	0	0	0	0	0	0	0	0	2	2	2	2	2	2	3	3	2	4	2	2	4	4	4	4	2	2	2
31	1	2	2	2	2	2	1	1	3	0	0	0	0	0	0	0	0	0	0	0	0	3	3	3	3	3	3	3	3	3	3	3	3	3	3	3	3	3	3	3
36	1	2	2	1	2	2	1	2	2	0	0	0	0	0	0	0	0	0	0	0	0	2	3	3	3	2	1	3	3	4	3	2	3	2	3	3	3	3	4	4
48	1	2	2	5	2	2	2	2	3	0	0	0	0	0	0	0	0	0	0	0	0	2	3	2	2	3	2	4	5	4	4	2	4	3	3	4	4	4	4	2
44	1	2	2	1	2	2	2	1	3	0	0	0	0	0	0	0	0	0	0	0	0	2	3	4	3	3	4	4	4	4	4	4	4	5	4	5	4	4	5	5
36	1	2	2	1	2	2	1	1	3	0	0	0	0	0	0	0	0	0	0	0	0	4	3	4	3	4	4	3	3	4	4	4	5	4	4	4	4	4	4	4
26	1	2	2	2	2	1	1	1	3	0	0	0	0	0	0	0	0	0	0	0	0	2	2	2	2	3	2	3	5	2	5	2	5	3	3	4	4	4	4	4
31	1	2	4	2	2	1	1	1	3	0	0	0	0	0	0	0	0	0	0	0	0	3	3	4	4	4	4	5	5	4	5	3	5	4	4	4	4	3	5	5
39	1	2	2	1	2	2	2	2	1	0	0	0	0	0	0	0	0	0	0	0	0	2	3	2	3	3	2	2	5	2	5	2	5	4	4	4	4	2	2	3
24	1	2	2	2	2	1	1	1	1	0	0	0	0	0	0	0	0	0	0	0	0	2	3	4	4	4	4	5	5	5	5	3	4	4	4	5	4	5	4	4
36	1	2	1	2	2	1	1	2	3	0	0	0	0	0	0	0	0	0	0	0	0	2	3	3	3	3	3	4	5	4	5	3	4	4	4	4	4	5	5	4
43	1	2	2	2	2	1	1	2	3	0	0	0	0	0	0	0	0	0	0	0	0	2	3	3	3	3	3	3	5	3	3	3	3	4	4	4	4	3	3	3
39	3	2	1	5	2	2	1	2	1	0	0	0	0	0	0	0	0	0	0	0	0	2	3	2	3	4	3	2	3	2	4	3	5	3	4	4	3	5	5	5
46	1	2	2	1	2	2	1	1	3	0	0	0	0	0	0	0	0	0	0	0	0	2	3	3	3	2	3	3	4	3	4	2	4	4	4	4	4	4	4	4
35	1	2	2	2	2	1	1	1	3	0	0	0	0	0	0	0	0	0	0	0	0	2	2	2	2	2	2	4	5	4	5	2	2	2	3	3	2	4	4	4
37	1	2	2	1	2	1	1	1	3	0	0	0	0	0	0	0	0	0	0	0	0	2	2	3	3	3	3	3	3	3	3	3	4	4	4	4	4	4	4	4
38	1	2	2	5	2	1	1	1	3	0	0	0	0	0	0	0	0	0	0	0	0	3	3	4	4	4	4	4	5	5	5	4	5	5	5	5	5	5	5	5
45	1	2	2	5	2	2	2	2	1	0	0	0	0	0	0	0	0	0	0	0	0	1	1	1	2	2	3	3	4	4	4	1	2	1	2	2	2	5	5	2
30	2	2	1	2	2	1	1	2	3	0	0	0	0	0	0	0	0	0	0	0	0	1	1	2	2	3	3	3	3	4	5	4	4	4	4	4	4	4	4	4
50	1	2	2	5	2	2	2	2	3	0	0	0	0	0	0	0	0	0	0	0	0	2	2	2	2	3	3	2	3	2	4	3	2	3	3	3	3	4	4	4
41	1	2	2	1	2	1	1	1	3	0	0	0	0	0	0	0	0	0	0	0	0	3	3	2	3	3	2	5	5	2	5	2	3	3	3	3	3	4	5	3
24	2	2	1	3	2	2	1	1	1	0	0	0	0	0	0	0	0	0	0	0	0	2	3	3	3	4	3	4	5	3	5	2	4	3	3	4	4	4	4	5
44	1	2	2	2	2	2	2	2	3	0	0	0	0	0	0	0	0	0	0	0	0	4	3	3	3	3	4	3	3	4	4	4	4	4	4	4	4	4	4	4
23	2	2	1	2	2	1	1	1	3	0	0	0	0	0	0	0	0	0	0	0	0	3	2	2	2	2	3	3	4	3	3	4	5	4	3	4	3	5	5	4
43	1	2	2	1	2	2	1	2	3	0	0	0	0	0	0	0	0	0	0	0	0	2	3	2	3	3	2	2	5	2	5	2	4	3	3	3	3	4	4	3
38	1	2	2	2	2	2	1	1	3	0	0	0	0	0	0	0	0	0	0	0	0	3	3	2	2	3	2	2	3	3	4	3	4	3	3	4	4	3	3	3
40	1	2	2	2	2	1	1	2	1	0	0	0	0	0	0	0	0	0	0	0	0	2	3	2	3	3	2	2	3	2	3	2	3	4	4	4	4	4	4	3
31	1	2	1	1	2	1	1	1	3	0	0	0	0	0	0	0	0	0	0	0	0	3	3	3	3	3	3	4	5	4	5	3	3	3	4	4	4	4	4	3
31	1	2	2	1	2	1	1	1	2	0	0	0	0	0	0	0	0	0	0	0	0	2	3	2	3	3	3	3	5	3	4	3	4	4	4	3	3	4	4	4
40	1	2	2	1	2	2	1	1	3	0	0	0	0	0	0	0	0	0	0	0	0	3	3	5	4	4	4	4	5	4	5	4	4	5	5	5	5	4	4	4
46	1	2	2	5	2	1	1	1	1	0	0	0	0	0	0	0	0	0	0	0	0	2	3	2	2	3	2	2	5	3	5	3	5	3	4	4	4	4	5	4
47	1	2	2	1	2	1	1	1	3	0	0	0	0	0	0	0	0	0	0	0	0	2	4	4	4	3	4	4	3	4	4	4	3	4	4	4	4	3	3	3
50	1	2	2	1	2	1	2	1	3	0	0	0	0	0	0	0	0	0	0	0	0	3	3	4	4	4	4	4	5	5	5	4	5	4	5	5	4	4	5	5
45	1	2	2	5	2	1	1	1	1	0	0	0	0	0	0	0	0	0	0	0	0	2	3	4	4	4	4	4	2	4	3	3	3	4	4	4	4	4	5	4
29	1	2	1	2	2	1	1	1	3	0	0	0	0	0	0	0	0	0	0	0	0	3	3	3	3	3	4	4	5		5	4	5	5	5	5	4	4	4	5
46	1	2	2	1	2	1	1	1	1	0	0	0	0	0	0	0	0	0	0	0	0	3	3	4	4	3	4	3	3	4	3	3	3	5	5	4	4	3	3	3
54	1	2	2	1	2	2	1	2	3	0	0	0	0	0	0	0	0	0	0	0	0	2	2	2	2	1	2	2	3	2	4	2	4	4	4	4	3	4	3	3
27	1	2	1	2	2	2	1	1	1	0	0	0	0	0	0	0	0	0	0	0	0	4	4	3	3	4	4	4	4	4	4	4	5	4	4	4	4	4	3	3
33	1	2	2	2	2	1	1	1	3	0	0	0	0	0	0	0	0	0	0	0	0	2	2	2	2	3	4	3	3	3	4	3	4	4	3	4	4	3	3	3
42	1	2	2	5	2	1	2	2	3	0	0	0	0	0	0	0	0	0	0	0	0	2	2	1	2	2	3	3	3	2	3	4	3	3	3	3	3	5	3	3
26	1	2	1	5	2	1	1	1	1	0	0	0	0	0	0	0	0	0	0	0	0	4	3	4	3	4	4	4	4	4	5	4	3	5	4	4	4	5	4	3
43	1	2	2	1	2	1	1	1	3	0	0	0	0	0	0	0	0	0	0	0	0	2	3	3	3	3	4	5	5	5	5	3	5	4	4	4	4	4	4	4
47	1	2	2	5	2	2	2	2	3	0	0	0	0	0	0	0	0	0	0	0	0	3	3	3	3	3	4	4	3	4	3	4	3	4	4	4	4	4	4	3
44	1	2	2	1	2	1	1	1	3	0	0	0	0	0	0	0	0	0	0	0	0	3	3	3	3	3	3	3	5	3	4	2	4	4	4	4	4	4	5	3
34	1	2	2	1	2	1	1	1	1	0	0	0	0	0	0	0	0	0	0	0	0	3	3	3	3	3	3	4	3	3	3	4	3	5	5	5	5	4	4	4
31	1	2	2	5	2	1	1	1	3	0	0	0	0	0	0	0	0	0	0	0	0	4	4	4	4	4	4	4	3	4	3	4	3	3	3	3	3	4	4	4
33	1	2	2	4	2	1	1	1	3	0	0	0	0	0	0	0	0	0	0	0	0	3	3	3	3	2	2	3	3	2	3	3	3	4	4	4	4	4	4	4
33	1	2	2	2	2	2	1	1	1	0	0	0	0	0	0	0	0	0	0	0	0	3	2	2	2	3	3	3	2	3	3	3	3	4	4	4	4	4	4	4
49	1	2	2	5	2	2	1	1	1	0	0	0	0	0	0	0	0	0	0	0	0	2	2	2	2	3	3	3	4	2	3	3	4	4	3	4	3	2	3	4
23	1	2	1	2	2	1	1	1	2	0	0	0	0	0	0	0	0	0	0	0	0	4	4	4	4	3	3	4	4	4	5	2	2	2	4	5	4	2	2	2
39	1	2	4	1	2	1	1	1	3	0	0	0	0	0	0	0	0	0	0	0	0	3	3	3	3	4	4	4	5	4	5	2	5	4	5	4	3	3	3	3
29	1	2	2	5	2	1	1	1	2	0	0	0	0	0	0	0	0	0	0	0	0	3	3	3	3	4	4	4	4	4	4	4	3	4	4	4	4	4	4	4
30	1	2	4	2	2	1	1	2	2	0	0	0	0	0	0	0	0	0	0	0	0	3	3	3	3	3	3	3	4	3	3	3	3	4	4	4	4	4	3	3
24	1	2	1	2	2	1	1	1	3	0	0	0	0	0	0	0	0	0	0	0	0	2	3	3	3	3	3	3	4	3	4	3	4	4	4	4	4	4	5	5
33	1	2	4	5	2	2	1	1	3	0	0	0	0	0	0	0	0	0	0	0	0	3	3	3	3	4	4	3	3	4	3	4	3	4	4	4	4	3	3	3
34	1	2	1	1	2	2	2	2	3	0	0	0	0	0	0	0	0	0	0	0	0	3	3	2	2	3	2	2	3	2	3	2	4	2	3	4	3	3	4	4
36	1	2	2	1	2	1	1	1	1	0	0	0	0	0	0	0	0	0	0	0	0	3	3	2	3	3	3	4	5	2	5	4	4	4	5	5	4	4	4	4
35	1	2	2	2	2	2	2	1	1	0	0	0	0	0	0	0	0	0	0	0	0	3	3	3	3	3	2	3	5	3	5	2	3	3	4	5	5	4	4	4
45	1	2	2	1	2	1	1	1	3	0	0	0	0	0	0	0	0	0	0	0	0	2	2	1	1	1	2	2	5	5	5	2	5	4	4	4	4	2	2	3
55	1	2	2	5	2	1	1	1	1	0	0	0	0	0	0	0	0	0	0	0	0	2	2	2	2	2	2	2	4	2	4	2	4	2	2	2	2	4	4	4
30	2	2	1	2	2	2	1	1	1	0	0	0	0	0	0	0	0	0	0	0	0	4	3	4	4	4	4	4	5	4	5	3	5	4	4	4	4	5	5	4
42	1	2	2	5	2	1	1	1	3	0	0	0	0	0	0	0	0	0	0	0	0	3	3	3	3	3	4	2	3	2	3	3	3	5	5	5	5	3	3	3
38	1	2	2	1	2	1	1	1	3	0	0	0	0	0	0	0	0	0	0	0	0	2	3	5	3	3	5	5	5	5	5	5	5	5	5	5	5	5	5	4
24	2	2	1	2	2	3	2	1	1	0	0	0	0	0	0	0	0	0	0	0	0	3	3	3	3	3	3	4	5	5	5	5	5	4	4	4	4	4	4	4
25	1	2	1	2	2	2	1	1	3	0	0	0	0	0	0	0	0	0	0	0	0	3	3	3	3	3	3	5	4	5	5	3	3	3	3	3	3	3	3	3
29	1	2	2	5	2	1	1	1	3	0	0	0	0	0	0	0	0	0	0	0	0	4	4	4	4	5	4	3	3	3	3	3	4	3	3	3	3	4	3	3
36	1	2	2	2	2	1	1	1	3	0	0	0	0	0	0	0	0	0	0	0	0	3	3	3	3	3	3	3	3	3	3	3	4	4	4	3	3	4	4	4
35	1	2	4	2	2	1	1	1	1	0	0	0	0	0	0	0	0	0	0	0	0	4	4	3	3	3	3	3	2	3	3	4	3	4	4	4	4	3	3	3
38	1	2	2	2	2	2	2	2	2	0	0	0	0	0	0	0	0	0	0	0	0	4	4	3	3	3	3	3	3	2	3	4	4	4	4	4	4	3	3	3
29	2	2	1	5	2	2	1	1	3	0	0	0	0	0	0	0	0	0	0	0	0	3	3	3	3	3	3	3	4	3	3	3	3	4	4	4	4	4	4	4
45	1	2	2	2	2	2	1	1	2	0	0	0	0	0	0	0	0	0	0	0	0	2	2	2	3	3	3	2	5	5	4	5	5	5	5	5	5	4	4	4
53	1	2	2	5	2	2	2	2	2	0	0	0	0	0	0	0	0	0	0	0	0	2	2	2	2	2	2	1	2	1	3	1	2	3	4	4	4	1	1	1
32	1	2	4	2	2	1	1	1	2	0	0	0	0	0	0	0	0	0	0	0	0	2	2	2	2	3	3	3	4	3	4	2	4	2	3	3	3	4	4	4
31	1	2	4	2	2	2	2	2	3	0	0	0	0	0	0	0	0	0	0	0	0	3	3	2	3	3	2	2	3	3	4	4	4	4	4	4	4	4	4	4
48	1	2	4	1	2	1	1	1	3	0	0	0	0	0	0	0	0	0	0	0	0	3	3	4	3	3	4	4	5	3	5	4	5	4	4	5	4	4	4	3
54	1	2	2	5	2	2	2	2	1	0	0	0	0	0	0	0	0	0	0	0	0	2	2	2	3	3	2	2	4	2	4	3	4	2	2	2	2	3	2	3
34	1	2	2	1	2	1	1	1	3	0	0	0	0	0	0	0	0	0	0	0	0	3	4	3	3	3	3	2	5	3	5	4	5	5	5	5	5	4	4	5
44	1	2	2	1	2	2	2	1	3	0	0	0	0	0	0	0	0	0	0	0	0	3	3	3	3	3	3	3	3	3	3	3	3	4	4	4	4	3	3	3
50	1	2	2	1	2	1	1	2	3	0	0	0	0	0	0	0	0	0	0	0	0	2	2	2	3	3	4	4	3	4	3	4	3	4	4	4	4	3	3	3
43	1	2	2	3	2	1	1	1	3	0	0	0	0	0	0	0	0	0	0	0	0	2	2	2	2	1	1	2	4	2	4	2	4	2	2	2	2	1	1	2
25	1	2	1	2	2	2	1	1	3	0	0	0	0	0	0	0	0	0	0	0	0	3	3	3	3	3	3	4	5	4	5	3	4	3	4	4	4	5	5	5
29	1	2	1	5	2	1	1	1	1	0	0	0	0	0	0	0	0	0	0	0	0	4	3	3	3	3	3	3	4	2	4	2	3	3	4	4	4	4	4	3
34	1	2	2	1	2	1	1	1	3	0	0	0	0	0	0	0	0	0	0	0	0	3	3	3	3	3	3	3	5	3	5	4	5	4	4	4	4	5	5	4
50	1	2	2	5	2	1	2	2	3	0	0	0	0	0	0	0	0	0	0	0	0	3	3	3	3	3	3	3	3	3	3	3	5	4	4	4	4	4	4	3
52	1	2	3	1	2	2	2	2	2	0	0	0	0	0	0	0	0	0	0	0	0	3	3	3	3	3	3	3	3	3	3	3	3	4	4	4	4	3	3	3
23	2	2	1	2	2	1	1	1	3	0	0	0	0	0	0	0	0	0	0	0	0	1	1	1	1	4	5	4	5	4	5	5	5	5	5	5	4	5	5	4
38	1	2	2	2	2	1	1	1	3	0	0	0	0	0	0	0	0	0	0	0	0	3	3	3	3	3	3	3	5	4	5	3	5	4	4	4	4	5	5	5
37	1	2	4	1	2	2	1	1	1	0	0	0	0	0	0	0	0	0	0	0	0	3	3	3	3	3	3	5	5	5	5	4	4	4	4	4	4	5	5	4
25	2	2	1	2	2	1	1	1	3	0	0	0	0	0	0	0	0	0	0	0	0	2	3	3	3	3	3	5	5	4	5	4	5	4	4	4	4	4	4	3
39	1	2	2	2	2	1	2	2	3	0	0	0	0	0	0	0	0	0	0	0	0	2	3	4	3	3	4	4	5	4	5	4	5	4	4	4	4	4	4	4
32	1	2	4	1	2	1	1	1	2	0	0	0	0	0	0	0	0	0	0	0	0	3	3	3	3	3	3	4	5	2	5	2	5	4	4	4	4	4	4	4
35	1	2	4	2	2	2	1	1	3	0	0	0	0	0	0	0	0	0	0	0	0	3	3	3	3	3	3	3	4	4	5	3	4	4	4	4	4	4	4	4
38	1	2	2	2	2	1	1	1	3	0	0	0	0	0	0	0	0	0	0	0	0	4	3	3	3	3	4	4	3	3	3	4	3	4	4	4	4	4	4	4
33	1	2	2	1	2	1	2	2	3	0	0	0	0	0	0	0	0	0	0	0	0	3	3	3	3	3	2	2	4	2	4	2	5	4	4	4	4	5	5	3
39	1	2	2	1	2	1	1	1	1	0	0	0	0	0	0	0	0	0	0	0	0	3	3	3	2	3	3	4	4	4	4	3	3	4	4	3	3	3	3	3
43	1	2	2	5	2	2	2	2	3	0	0	0	0	0	0	0	0	0	0	0	0	3	2	2	3	2	3	2	2	2	2	3	3	4	4	4	4	3	3	3
50	1	2	2	1	2	1	1	1	3	0	0	0	0	0	0	0	0	0	0	0	0	2	3	2	3	3	2	2	2	2	2	2	2	3	3	3	3	4	4	4
53	1	2	2	1	2	1	1	1	3	0	0	0	0	0	0	0	0	0	0	0	0	2	2	1	1	2	1	2	4	2	4	2	4	2	2	2	4	3	2	3
54	1	2	4	5	2	2	2	2	3	0	0	0	0	0	0	0	0	0	0	0	0	3	3	2	3	2	3	2	2	2	3	1	2	2	3	3	3	2	2	3
40	1	2	2	1	2	1	1	2	1	0	0	0	0	0	0	0	0	0	0	0	0	1	2	2	3	3	3	4	5	3	5	3	5	4	4	4	4	5	5	5
36	1	2	2	2	2	2	2	2	3	0	0	0	0	0	0	0	0	0	0	0	0	3	3	3	3	3	4	3	4	3	4	4	5	4	4	4	4	4	4	4
48	1	2	4	1	2	3	2	2	3	0	0	0	0	0	0	0	0	0	0	0	0	2	2	2	2	2	3	2	3	2	3	2	3	4	4	4	4	4	5	4
30	1	2	2	1	2	1	1	2	1	0	0	0	0	0	0	0	0	0	0	0	0	3	4	3	3	3	3	3	5	4	5	3	4	3	3	4	3	3	3	4
43	1	2	2	1	2	1	1	2	3	0	0	0	0	0	0	0	0	0	0	0	0	2	2	2	3	3	2	2	5	2	5	2	3	2	2	2	2	4	4	4
47	1	2	2	4	2	2	1	1	3	0	0	0	0	0	0	0	0	0	0	0	0	2	3	2	3	3	5	5	5	4	4	5	5	4	4	4	4	4	4	4
39	1	2	4	1	2	2	2	2	1	0	0	0	0	0	0	0	0	0	0	0	0	3	3	3	3	3	4	4	4	4	4	4	5	4	4	4	4	4	5	5
36	1	2	2	2	2	1	1	1	3	0	0	0	0	0	0	0	0	0	0	0	0	2	3	3	3	3	3	3	5	3	5	3	5	4	4	4	4	4	4	4
45	1	2	4	2	2	1	1	1	3	0	0	0	0	0	0	0	0	0	0	0	0	3	3	2	3	3	4	4	5	4	5	3	2	3	4	3	4	5	5	4
40	1	2	4	2	2	3	2	2	3	0	0	0	0	0	0	0	0	0	0	0	0	3	2	3	2	3	3	4	3	4	4	4	4	4	4	4	4	4	4	4
40	1	2	2	1	2	1	1	2	1	0	0	0	0	0	0	0	0	0	0	0	0	2	2	2	2	3	2	2	2	3	4	2	4	2	3	2	2	4	4	4
45	1	2	2	5	2	1	1	2	3	0	0	0	0	0	0	0	0	0	0	0	0	3	3	2	3	3	2	3	4	4	4	2	2	2	2	3	3	3	4	5
44	1	2	2	2	2	3	2	2	2	0	0	0	0	0	0	0	0	0	0	0	0	2	2	2	2	2	2	2	3	2	3	3	3	4	4	4	4	4	4	4
53	1	2	3	4	2	2	2	2	3	0	0	0	0	0	0	0	0	0	0	0	0	3	3	2	3	3	2	2	3	2	3	3	4	4	4	4	4	4	3	3
40	1	2	2	1	2	1	3	2	2	0	0	0	0	0	0	0	0	0	0	0	0	2	3	3	3	3	2	2	3	3	4	3	3	4	4	4	4	4	4	4
30	1	2	2	2	2	2	2	1	3	0	0	0	0	0	0	0	0	0	0	0	0	2	2	3	4	3	3	3	5	4	4	4	4	4	4	4	4	1	2	3
39	1	2	4	2	2	2	1	1	1	0	0	0	0	0	0	0	0	0	0	0	0	3	3	3	4	3	4	4	5	4	5	4	5	5	5	5	5	5	4	5
42	1	2	2	5	2	2	1	1	3	0	0	0	0	0	0	0	0	0	0	0	0	2	3	3	3	3	5	2	5	2	5	4	5	1	4	4	4	5	4	4
50	1	2	2	4	2	1	1	1	3	0	0	0	0	0	0	0	0	0	0	0	0	2	3	2	3	3	2	2	5	3	4	2	4	2	3	3	3	4	4	4
45	1	2	2	1	2	1	2	2	2	0	0	0	0	0	0	0	0	0	0	0	0	2	3	2	3	3	2	2	4	2	3	2	4	3	3	3	4	2	2	3
40	1	2	4	5	2	1	1	1	3	0	0	0	0	0	0	0	0	0	0	0	0	3	4	4	4	4	5	4	5	5	5	5	5	5	4	4	4	5	5	5
42	1	2	2	1	2	1	1	2	3	0	0	0	0	0	0	0	0	0	0	0	0	2	3	5	3	4	5	5	5	5	5	4	5	4	5	4	4	5	5	5
42	1	2	4	1	2	1	1	1	2	0	0	0	0	0	0	0	0	0	0	0	0	2	3	3	4	3	3	3	4	4	4	5	3	4	4	4	4	4	4	4
55	1	2	2	1	2	2	2	2	3	0	0	0	0	0	0	0	0	0	0	0	0	3	2	2	2	3	3	3	3	3	3	3	3	3	3	3	3	3	3	3
53	1	2	2	2	2	2	2	2	3	0	0	0	0	0	0	0	0	0	0	0	0	4	3	3	3	3	4	4	4	4	5	4	4	4	4	4	4	4	4	4
30	1	2	1	5	2	1	1	1	3	0	0	0	0	0	0	0	0	0	0	0	0	2	2	2	2	2	1	1	5	1	5	2	4	2	2	3	4	4	5	5
33	1	2	2	5	2	1	1	1	3	0	0	0	0	0	0	0	0	0	0	0	0	3	3	3	3	3	4	3	3	4	5	4	5	4	4	4	4	4	4	4
37	1	2	4	2	2	1	1	1	2	0	0	0	0	0	0	0	0	0	0	0	0	2	2	2	2	4	4	5	5	5	5	5	5	4	4	4	4	5	5	5
29	1	2	2	2	2	2	1	1	3	0	0	0	0	0	0	0	0	0	0	0	0	2	3	2	3	3	3	3	4	2	4	4	5	4	4	4	4	4	4	3
48	1	2	2	1	2	2	1	1	3	0	0	0	0	0	0	0	0	0	0	0	0	3	2	2	3	3	2	4	4	4	4	2	4	4	5	5	4	4	4	3
50	1	2	2	5	2	2	2	2	3	0	0	0	0	0	0	0	0	0	0	0	0	3	3	3	3	3	3	2	3	3	4	3	5	4	4	4	4	5	5	5
30	1	2	2	1	2	1	1	1	3	0	0	0	0	0	0	0	0	0	0	0	0	3	3	3	3	3	4	3	3	3	3	4	3	4	4	4	4	4	4	4
25	1	2	2	2	2	1	1	1	3	0	0	0	0	0	0	0	0	0	0	0	0	3	3	3	3	3	4	3	3	4	3	4	3	4	3	3	4	5	5	4
28	1	2	2	5	2	2	2	2	3	0	0	0	0	0	0	0	0	0	0	0	0	3	3	4	3	3	3	4	3	3	4	3	5	4	5	4	4	4	3	3
31	1	2	1	2	2	1	1	1	3	0	0	0	0	0	0	0	0	0	0	0	0	2	3	3	3	4	4	5	5	5	5	4	5	3	3	3	3	3	4	3
38	1	2	2	2	2	2	2	2	3	0	0	0	0	0	0	0	0	0	0	0	0	3	3	3	3	2	3	2	3	2	3	3	2	3	3	4	4	5	4	3
35	1	2	2	2	2	1	1	1	2	0	0	0	0	0	0	0	0	0	0	0	0	2	3	3	3	3	2	2	3	3	3	3	4	3	3	4	4	3	3	3
24	2	2	1	2	2	1	1	1	3	0	0	0	0	0	0	0	0	0	0	0	0	2	3	4	4	3	3	4	5	4	5	2	4	3	4	4	4	4	5	5
37	1	2	2	2	2	1	1	1	3	0	0	0	0	0	0	0	0	0	0	0	0	2	2	3	3	3	3	3	2	3	3	3	3	4	4	4	4	4	3	3
23	1	2	1	2	2	1	1	2	3	0	0	0	0	0	0	0	0	0	0	0	0	4	3	3	4	3	4	4	5	4	5	3	5	4	5	5	5	4	2	3
38	1	2	2	1	2	1	1	1	1	0	0	0	0	0	0	0	0	0	0	0	0	3	3	2	3	3	3	3	4	3	3	3	4	4	4	4	4	3	4	3
55	1	2	2	1	2	2	1	1	3	0	0	0	0	0	0	0	0	0	0	0	0	1	1	1	1	1	1	1	2	1	2	2	1	2	2	4	3	1	1	1
35	1	2	2	1	2	2	1	2	3	0	0	0	0	0	0	0	0	0	0	0	0	2	2	3	3	3	2	3	5	4	5	2	5	2	2	3	3	3	2	3
41	1	2	2	1	2	3	1	1	3	0	0	0	0	0	0	0	0	0	0	0	0	3	2	3	2	3	2	4	5	4	5	4	5	3	4	4	4	4	5	5
20	1	2	4	2	2	1	1	1	3	0	0	0	0	0	0	0	0	0	0	0	0	2	2	3	3	3	3	3	5	3	3	3	4	4	4	4	4	4	4	4
46	1	2	2	1	2	2	1	2	3	0	0	0	0	0	0	0	0	0	0	0	0	3	3	3	3	2	2	3	4	3	3	4	3	3	3	3	4	4	4	4
48	1	2	2	5	2	1	1	1	3	0	0	0	0	0	0	0	0	0	0	0	0	3	3	3	3	3	3	3	5	3	3	3	5	4	4	4	4	5	5	5
43	1	2	2	2	2	2	1	2	1	0	0	0	0	0	0	0	0	0	0	0	0	3	4	3	3	3	4	5	4	5	5	3	4	3	3	4	3	5	5	4
48	1	2	2	2	2	2	1	1	3	0	0	0	0	0	0	0	0	0	0	0	0	2	2	3	3	3	3	2	3	4	3	3	3	3	3	4	4	4	4	4
39	1	2	2	4	2	3	1	2	3	0	0	0	0	0	0	0	0	0	0	0	0	3	3	3	3	3	3	3	3	3	3	5	5	4	4	4	4	4	4	4
31	1	2	2	1	2	2	1	1	3	0	0	0	0	0	0	0	0	0	0	0	0	2	2	2	2	3	2	2	2	1	3	2	3	2	4	3	3	2	3	3
24	1	2	2	2	2	1	1	1	3	0	0	0	0	0	0	0	0	0	0	0	0	2	3	3	3	3	2	4	4	4	5	3	3	3	3	4	3	2	4	3
54	1	2	2	1	2	2	2	2	3	0	0	0	0	0	0	0	0	0	0	0	0	2	2	2	2	2	2	3	5	4	5	2	3	3	4	4	4	3	3	3
38	1	2	2	1	2	1	1	2	1	0	0	0	0	0	0	0	0	0	0	0	0	3	3	2	3	3	2	2	3	2	4	2	3	4	4	3	3	4	4	3
39	1	2	2	2	2	1	1	1	3	0	0	0	0	0	0	0	0	0	0	0	0	2	2	3	3	3	3	3	3	2	3	3	3	3	3	4	3	3	4	4
55	1	2	2	1	2	2	2	2	3	0	0	0	0	0	0	0	0	0	0	0	0	3	3	3	3	3	4	3	4	4	4	4	5	4	4	4	4	4	4	4
47	1	2	2	1	2	3	2	1	3	0	0	0	0	0	0	0	0	0	0	0	0	2	2	2	2	2	1	3	5	3	5	3	5	4	4	4	4	5	5	4
54	1	2	2	5	2	2	2	2	3	0	0	0	0	0	0	0	0	0	0	0	0	2	3	2	3	3	3	2	3	2	3	3	3	3	4	4	3	3	4	3
32	1	2	4	1	2	1	1	1	3	0	0	0	0	0	0	0	0	0	0	0	0	3	3	5	3	4	3	3	5	3	5	4	5	3	5	5	5	5	5	5
40	1	2	2	1	2	1	1	1	1	0	0	0	0	0	0	0	0	0	0	0	0	2	2	3	3	3	1	3	4	4	5	1	2	4	4	4	4	3	2	2
31	1	2	2	2	2	3	2	1	3	0	0	0	0	0	0	0	0	0	0	0	0	2	2	2	2	2	2	2	2	2	4	2	4	3	2	3	3	3	3	3
41	1	2	2	2	2	2	2	2	1	0	0	0	0	0	0	0	0	0	0	0	0	3	3	3	3	3	3	2	4	2	3	4	4	4	3	3	4	3	3	3
37	1	2	2	5	2	2	1	1	3	0	0	0	0	0	0	0	0	0	0	0	0	3	3	3	3	3	3	3	5	5	5	4	5	4	4	5	4	4	4	5
34	1	2	2	2	2	1	1	1	3	0	0	0	1	1	1	0	0	0	0	0	1	3	3	4	3	3	3	3	4	2	2	4	5	4	3	3	3	5	5	4
42	1	2	4	2	2	1	1	1	3	0	1	0	0	0	0	0	0	0	0	0	1	1	2	2	2	2	2	2	4	2	4	2	4	3	2	2	2	3	3	3
26	1	2	1	2	2	1	1	1	1	0	0	0	1	1	1	0	0	0	0	0	1	2	3	2	3	3	4	3	3	4	4	2	3	4	3	3	3	4	5	5
27	1	2	2	1	2	2	1	1	3	0	0	1	0	0	1	0	0	0	0	0	1	3	3	3	3	3	3	4	4	4	4	5	5	5	4	3	3	4	4	4
23	1	2	1	2	2	1	1	1	1	0	1	0	0	0	0	0	0	0	0	0	1	1	2	2	2	3	1	4	3	3	4	2	4	2	3	4	3	4	4	4
38	1	2	2	5	2	2	2	2	3	0	0	0	1	1	1	0	0	0	0	0	1	2	3	3	3	3	2	3	3	4	2	4	3	4	4	4	3	4	4	4
43	1	2	2	1	2	1	1	1	1	0	0	0	1	0	1	0	0	0	0	0	1	1	2	2	2	2	2	2	4	3	3	3	3	4	3	3	2	3	3	3
43	1	2	2	1	2	1	1	1	3	0	0	0	0	0	0	1	1	0	0	0	1	2	2	4	3	3	2	2	3	2	3	4	4	4	3	3	3	4	4	3
40	1	2	4	2	2	1	1	1	3	0	0	1	0	0	1	1	0	0	0	0	1	3	2	3	3	2	4	4	2	5	2	3	3	4	3	3	3	4	4	4
38	1	2	2	4	2	2	2	1	2	0	0	0	1	0	1	0	0	0	0	0	1	3	3	3	3	3	3	3	4	4	4	4	3	4	4	3	3	4	4	4
45	1	2	2	4	2	1	3	2	2	0	0	0	1	0	1	0	0	0	0	0	1	2	3	2	3	3	2	4	3	2	3	2	3	4	3	3	3	4	4	5
36	1	2	2	2	2	2	1	1	3	0	0	0	0	0	0	0	0	0	1	0	1	1	2	2	2	3	2	2	3	2	3	1	1	4	3	3	3	3	3	3
30	1	2	2	1	2	1	1	1	2	0	0	1	0	0	1	0	1	0	0	0	1	1	2	2	2	2	1	3	4	3	4	2	3	3	3	3	3	4	4	4
42	1	2	2	1	2	2	2	2	3	0	0	1	1	0	1	0	0	0	0	0	1	2	3	3	2	3	2	2	3	2	4	5	3	4	3	3	3	5	5	5
52	1	2	2	1	2	2	2	2	3	0	0	1	1	0	1	0	0	0	0	0	1	2	2	2	3	3	3	3	4	3	4	3	3	3	2	2	2	4	4	3
31	1	2	4	2	2	2	2	1	3	0	0	0	1	0	1	0	0	0	0	0	1	2	3	2	3	3	3	3	5	3	5	3	5	4	3	3	3	2	2	2
41	1	2	2	1	2	1	1	1	3	0	0	1	0	0	1	0	0	0	0	0	1	2	2	3	3	3	3	3	4	4	4	4	4	4	3	3	3	4	4	5
40	1	2	2	2	2	1	1	2	1	0	0	0	1	1	1	0	0	0	1	0	1	2	2	3	3	3	5	3	3	4	4	5	5	1	4	4	3	4	4	5
34	1	2	2	5	2	3	1	1	3	0	0	1	0	0	1	0	0	0	0	0	1	1	2	2	3	3	2	3	4	4	4	3	4	4	4	4	4	4	4	4
40	1	2	1	2	2	2	2	1	3	0	1	0	0	0	0	1	1	0	0	0	1	2	2	3	3	2	3	4	4	4	4	4	5	5	4	4	4	5	5	5
33	1	2	2	1	2	2	1	2	2	0	0	1	1	0	1	0	0	0	0	0	1	2	1	2	3	3	3	4	4	4	4	4	5	4	4	4	3	5	5	5
39	1	2	2	1	2	1	1	2	2	0	0	1	1	0	1	0	0	0	0	0	1	2	2	2	3	3	3	2	4	5	5	3	3	4	4	4	4	4	5	3
49	1	2	2	1	2	1	1	1	2	0	0	0	1	0	1	0	0	0	0	0	1	3	3	3	3	3	3	4	4	3	4	3	4	4	4	4	3	4	4	4
46	1	2	2	5	2	1	1	1	3	0	0	1	1	0	1	0	0	0	0	0	1	3	3	4	3	3	2	2	4	4	5	5	5	4	3	3	3	5	5	5
39	1	2	4	5	2	2	1	1	1	0	0	1	0	0	1	0	0	0	0	0	1	2	3	2	3	3	1	4	4	3	4	3	3	3	2	1	2	2	3	3
37	1	2	4	1	2	1	1	1	3	0	0	0	1	0	1	0	0	0	0	0	1	2	2	3	2	3	2	3	4	3	4	3	3	4	3	3	3	5	3	3
36	1	2	2	5	2	1	1	1	2	0	0	0	0	0	0	0	0	0	0	1	1	1	2	3	3	3	3	3	4	3	2	4	3	4	4	4	2	4	4	4
39	1	2	2	1	2	1	1	1	3	0	0	1	0	0	1	0	0	0	0	0	1	2	2	4	4	3	3	4	4	4	4	4	3	2	4	3	3	5	5	3
44	1	2	2	1	2	1	1	2	1	0	0	0	0	1	1	0	0	0	0	0	1	2	1	2	3	2	2	3	4	3	3	2	4	2	2	2	2	4	5	5
30	1	2	2	1	2	1	1	1	3	0	1	0	0	0	0	0	0	0	0	0	1	3	2	4	3	4	3	4	4	5	5	5	5	4	3	4	1	4	4	3
36	1	2	2	1	2	1	1	1	1	0	0	0	1	0	1	0	0	0	0	0	1	2	3	3	3	3	4	3	4	3	4	3	3	4	3	3	4	4	4	4
32	1	2	2	5	2	2	2	2	3	0	1	0	0	0	0	0	0	0	0	0	1	2	1	2	3	3	2	2	4	2	3	2	4	4	3	2	3	4	4	3
34	1	2	2	5	2	1	1	1	2	0	1	0	0	0	0	0	0	0	0	0	1	2	2	2	3	3	2	2	2	2	3	2	2	4	3	4	3	2	2	3
42	1	2	2	1	2	2	1	1	3	0	0	1	1	0	1	0	0	0	0	0	1	2	1	3	4	3	3	4	4	4	4	5	5	5	4	3	4	5	5	5
52	1	2	2	2	2	2	1	2	3	0	0	1	1	0	1	0	0	0	0	0	1	2	3	2	2	2	2	2	3	3	3	2	3	3	3	3	3	4	4	3
44	1	2	2	2	2	2	1	2	2	0	0	0	1	0	1	0	0	0	0	0	1	2	2	2	3	3	4	2	4	2	4	4	5	4	3	3	3	4	4	4
43	1	2	2	1	2	1	1	1	3	0	0	1	0	0	1	0	0	0	0	0	1	2	3	2	3	3	2	2	4	2	4	2	4	4	3	3	2	4	5	5
30	1	2	4	2	2	3	1	1	3	0	0	0	0	1	1	0	0	0	0	0	1	1	2	2	3	3	2	2	4	2	3	2	3	3	4	3	3	2	4	3
40	1	2	4	2	2	1	1	1	2	0	0	1	1	0	1	0	0	0	0	0	1	3	2	3	3	3	3	3	5	4	5	3	5	4	3	3	3	3	3	3
37	1	2	2	2	2	1	1	1	3	0	0	0	1	1	1	0	0	0	0	0	1	2	2	3	3	3	3	4	4	3	3	4	4	5	4	4	4	4	4	4
30	1	2	2	1	2	1	1	1	2	0	1	0	0	0	0	0	0	0	0	0	1	3	2	3	3	4	3	4	4	4	4	4	5	5	4	4	4	4	4	5
46	1	2	3	1	2	2	1	1	3	0	0	0	1	1	1	0	0	0	0	0	1	2	2	2	2	3	2	3	4	4	4	2	4	4	4	4	4	5	5	5
32	1	2	2	5	2	2	1	1	1	0	1	0	0	0	0	0	0	0	0	0	1	2	3	2	3	2	2	3	3	1	2	3	3	3	2	3	3	3	3	2
43	1	2	2	1	2	1	1	1	3	0	1	0	0	0	0	0	0	0	0	0	1	2	3	3	3	3	3	2	4	4	4	4	5	5	4	4	4	5	5	5
43	1	2	2	1	2	2	1	1	3	0	0	1	0	0	1	0	0	0	0	0	1	1	2	2	3	3	2	2	3	2	3	2	5	4	4	4	3	3	3	3
49	1	2	2	4	2	2	2	2	2	0	0	0	1	1	1	0	0	0	0	0	1	2	2	2	3	3	4	4	3	4	5	4	5	4	3	4	3	4	5	4
34	1	2	2	5	2	1	1	1	3	0	0	0	1	1	1	0	0	0	0	0	1	2	2	2	2	3	2	2	3	3	3	2	3	4	4	4	4	4	4	3
29	1	2	1	2	2	2	1	1	2	0	0	0	1	0	1	0	0	0	0	0	1	2	3	3	3	3	3	5	4	4	5	2	4	3	4	4	4	5	5	4
26	1	2	1	2	2	1	1	2	3	0	0	1	0	0	1	0	0	0	0	0	1	2	2	2	2	3	2	3	3	2	3	2	4	2	3	3	3	3	3	3
43	1	2	2	2	2	1	1	1	3	0	1	0	0	0	0	0	0	0	0	0	1	3	4	3	3	4	4	5	3	4	5	5	5	4	4	4	4	4	5	4
41	1	2	4	1	2	2	1	1	1	0	1	0	0	0	0	0	0	0	0	0	1	2	2	3	3	3	2	3	4	3	4	4	5	4	4	4	4	4	4	3
23	2	2	1	5	2	2	1	1	3	0	0	1	0	0	1	0	0	0	0	0	1	2	3	4	2	2	2	5	4	3	4	4	2	5	3	3	3	4	4	3
23	1	2	2	1	2	2	1	1	2	0	0	0	1	0	1	0	0	0	0	0	1	2	3	2	3	3	4	1	4	2	4	4	5	4	4	3	3	2	4	5
37	1	2	2	5	2	2	2	2	3	0	0	0	1	1	1	0	0	0	0	0	1	2	3	4	3	1	1	3	2	1	3	2	3	3	3	4	4	5	5	3
36	1	2	4	3	2	2	2	1	2	0	0	0	0	0	0	1	1	0	0	0	1	3	3	3	3	2	3	2	1	2	2	2	3	2	3	3	3	2	3	3
34	1	2	1	2	2	1	1	1	2	0	0	0	1	1	1	0	0	0	0	0	1	3	2	4	3	4	4	4	4	4	3	5	5	5	4	3	3	3	4	5
46	1	2	2	1	2	1	1	1	3	0	0	0	0	0	0	1	1	0	0	0	1	2	3	3	3	3	3	3	5	2	3	3	5	4	3	3	3	4	5	4
44	1	2	2	1	2	1	1	1	3	0	1	0	0	0	0	0	0	0	0	0	1	2	3	3	3	3	3	3	3	4	4	4	5	4	4	4	4	4	4	4
45	1	2	2	2	2	1	1	1	1	0	0	0	1	1	1	0	0	0	0	0	1	3	2	3	3	3	4	3	4	3	4	4	3	4	4	4	3	3	4	4
36	1	2	2	4	2	2	1	1	3	0	1	0	0	0	0	0	0	0	0	0	1	2	3	3	2	3	3	5	4	4	5	5	5	5	4	4	3	5	5	5
43	1	2	2	5	2	2	2	2	3	0	0	0	1	0	1	0	0	0	0	0	1	2	3	3	2	3	3	2	3	3	2	3	3	4	4	4	4	4	4	5
40	1	2	2	2	2	2	2	2	3	0	1	1	0	0	1	0	0	0	0	0	1	1	3	1	3	3	2	2	4	2	4	2	3	3	3	3	3	4	4	5
45	1	2	2	2	2	1	1	2	3	0	0	0	1	1	1	0	0	0	0	0	1	2	2	3	2	2	2	2	3	2	3	2	4	2	2	2	2	3	4	3
37	1	2	2	2	2	1	1	2	2	0	0	0	1	1	1	0	0	0	0	0	1	2	2	2	2	3	3	3	4	3	3	3	3	4	4	4	3	4	4	3
36	1	2	4	5	2	2	1	1	3	0	1	0	0	0	0	0	0	0	0	0	1	2	1	2	3	3	2	4	5	4	3	2	2	4	5	4	4	2	4	3
30	1	2	1	2	2	1	1	1	3	0	0	0	1	0	1	0	0	0	0	0	1	2	3	3	3	3	2	3	4	4	5	3	5	4	5	4	4	4	5	5
28	1	2	4	5	2	2	2	2	1	0	0	1	0	0	1	0	0	0	0	0	1	2	3	3	3	3	3	2	3	3	3	5	5	5	4	3	3	4	4	4
41	1	2	2	1	2	2	1	1	2	0	0	1	0	0	1	0	1	0	0	0	1	2	3	3	3	3	3	3	2	3	4	4	5	4	3	3	3	4	4	3
24	2	2	1	2	2	2	2	2	3	0	0	0	1	1	1	0	0	0	0	0	1	2	2	3	3	3	3	3	4	4	3	4	3	4	4	4	4	3	3	3
20	2	2	1	5	2	1	1	1	3	0	1	0	0	0	0	0	0	0	0	0	1	2	3	2	3	1	4	2	3	2	3	2	5	4	3	3	3	4	4	4
40	1	2	2	1	2	1	1	2	1	0	0	0	0	1	1	0	0	0	0	0	1	2	3	2	3	2	4	4	3	4	4	3	3	4	3	3	3	4	4	4
46	1	2	4	5	2	2	2	2	3	0	1	0	0	0	0	0	0	0	0	0	1	2	3	2	3	3	2	2	3	2	3	2	3	2	3	3	3	4	4	3
44	1	2	2	4	2	2	2	2	3	0	0	1	0	0	1	0	0	0	0	0	1	3	2	3	3	3	3	3	4	4	4	4	4	4	4	4	4	4	4	4
45	1	2	2	1	2	2	1	1	2	0	1	0	0	0	0	0	0	0	0	0	1	3	3	2	3	3	3	3	4	2	4	4	4	4	4	4	4	2	3	3
32	1	2	2	2	2	2	1	2	3	0	0	0	1	1	1	0	0	0	0	0	1	2	2	2	2	1	1	3	1	2	5	3	3	4	4	4	4	4	4	3
48	1	2	4	1	2	2	2	2	1	0	1	0	0	0	0	0	0	0	0	0	1	2	2	2	2	3	2	2	4	2	4	2	4	2	3	3	2	2	2	2
35	1	2	1	2	2	1	1	2	3	0	0	1	0	0	1	0	0	0	0	0	1	2	3	2	3	3	2	3	5	3	5	2	4	3	3	3	3	4	4	4
44	1	2	2	1	2	1	1	1	3	0	1	0	0	0	0	0	0	0	0	0	1	2	3	2	3	3	2	1	1	4	4	2	5	3	4	4	4	4	4	4
34	1	2	2	5	2	2	2	2	3	0	1	0	0	0	0	0	0	0	0	0	1	3	3	2	3	2	3	3	3	4	3	4	3	4	4	4	4	4	4	4
28	1	2	1	2	2	2	1	1	2	0	1	0	0	0	0	0	0	0	0	0	1	2	2	3	2	3	3	3	3	3	3	3	3	3	3	3	3	4	4	4
45	1	2	2	4	2	2	2	2	3	0	0	0	1	1	1	0	0	0	0	0	1	2	2	1	1	3	1	3	3	3	4	3	3	3	3	4	4	4	3	3
43	1	2	2	1	2	2	1	1	3	0	1	0	0	0	0	0	0	0	0	0	1	2	3	2	2	3	2	2	3	3	4	2	3	2	4	4	4	4	4	3
45	1	2	2	1	2	1	1	1	1	0	0	0	1	1	1	0	0	0	0	0	1	2	2	2	2	3	2	2	4	3	3	2	3	4	3	3	3	4	4	3
53	1	2	2	5	2	1	1	1	3	0	0	1	1	0	1	0	0	0	0	0	1	2	3	3	2	2	2	2	3	2	3	3	3	4	4	4	4	4	4	4
35	1	2	2	2	2	1	2	2	2	0	0	1	1	0	1	0	0	0	0	0	1	2	2	2	2	3	3	2	3	2	3	2	3	4	4	4	4	4	4	3
30	1	2	4	1	2	1	1	1	3	0	0	1	0	0	1	0	1	0	0	0	1	2	3	2	2	3	3	3	3	3	4	5	3	4	4	4	4	4	5	4
45	1	2	2	5	2	3	1	1	2	0	0	0	1	0	1	0	0	0	0	0	1	2	2	3	3	3	4	3	3	4	3	4	4	4	3	4	3	4	4	4
28	1	2	2	4	2	2	1	1	3	0	0	1	1	0	1	0	0	0	0	0	1	2	2	2	2	2	3	4	4	3	3	2	4	3	4	4	4	4	4	4
42	1	2	2	4	2	1	1	1	1	0	0	1	0	0	1	0	0	0	0	0	1	3	2	3	3	2	4	4	3	5	3	3	3	4	4	5	4	3	4	3
48	1	2	2	1	2	1	1	1	3	0	1	0	0	0	0	0	0	0	0	0	1	2	3	3	3	3	4	4	4	4	4	4	4	4	4	4	4	4	4	3
38	1	2	2	1	2	1	1	1	2	0	0	1	1	0	1	0	1	0	0	0	1	1	2	2	2	2	2	2	3	3	3	3	2	3	3	4	4	3	4	4
44	1	2	2	2	2	1	1	1	3	0	1	0	0	0	0	0	0	0	0	0	1	2	3	3	2	2	3	3	3	3	4	3	3	5	5	4	4	4	4	4
47	1	2	2	4	2	2	2	2	2	0	0	0	0	0	0	0	1	0	0	0	1	2	2	2	2	2	1	1	2	1	3	1	4	1	2	2	1	1	2	2
36	1	2	2	2	2	1	1	1	1	0	1	0	0	0	0	0	0	0	0	0	1	2	3	3	3	3	3	2	4	4	4	3	4	4	4	4	3	3	4	3
54	1	2	2	5	2	3	2	2	3	0	0	1	0	0	1	0	0	0	0	0	1	3	3	3	2	2	3	3	3	4	3	4	3	4	4	4	4	3	3	3
40	1	2	2	1	2	2	1	1	3	0	0	1	1	0	1	0	0	0	0	0	1	3	2	3	2	3	3	3	3	2	3	4	4	4	4	5	4	4	4	4
37	1	2	4	2	2	1	1	1	2	0	0	1	0	0	1	1	0	0	0	0	1	3	3	3	3	2	3	4	4	2	4	3	3	4	1	4	3	4	5	4
48	1	2	2	5	2	1	1	1	2	0	0	0	1	1	1	0	0	0	0	0	1	2	3	3	3	3	3	2	4	3	4	3	5	4	4	5	5	5	5	4
44	1	2	2	1	2	2	1	1	2	0	0	0	1	1	1	0	0	0	0	0	1	3	3	3	3	3	3	3	4	3	3	3	3	5	5	1	3	3	4	3
55	1	2	2	1	2	1	1	1	3	0	0	0	0	1	1	0	0	0	0	0	1	2	2	2	1	2	1	1	3	1	3	2	4	4	3	3	4	2	3	3
37	1	2	2	5	2	1	1	1	3	0	1	0	0	0	0	0	0	0	0	0	1	2	3	3	3	3	3	3	4	2	4	2	3	3	3	3	3	4	4	3
36	1	2	2	1	2	2	1	2	1	0	0	1	0	0	1	0	0	0	0	0	1	2	3	2	3	3	2	3	2	2	3	3	5	4	2	3	3	4	4	4
50	1	2	2	5	2	2	1	1	1	0	1	0	0	0	0	0	0	0	0	0	1	3	2	3	3	3	3	2	4	2	4	3	5	3	4	4	4	5	5	4
49	1	2	2	4	2	1	1	1	1	0	0	0	1	1	1	0	0	0	0	0	1	2	3	3	3	3	3	2	2	2	2	3	3	4	4	5	5	5	5	5
40	1	2	4	1	2	2	2	2	3	0	0	0	1	0	1	0	0	0	0	0	1	3	2	3	2	3	4	3	3	3	3	3	4	3	3	4	4	3	3	3
45	1	2	2	2	2	2	2	2	3	0	0	0	0	0	0	0	0	0	0	1	1	2	2	2	3	3	2	3	4	3	4	2	3	2	4	4	4	4	5	5
44	1	2	2	5	2	2	2	2	1	0	0	1	1	0	1	0	0	0	0	0	1	3	2	2	3	3	2	3	4	3	1	3	3	3	4	4	3	4	3	3
55	1	2	2	1	2	2	2	2	3	0	1	0	0	0	0	1	1	0	0	0	1	3	3	2	3	3	4	3	4	4	4	4	4	4	4	4	4	4	4	4
41	1	2	2	1	2	2	1	2	3	0	0	0	1	1	1	0	1	0	0	0	1	3	3	2	2	3	2	3	3	3	5	2	3	4	4	3	2	5	5	5
45	1	2	2	2	2	1	1	1	3	0	0	0	1	1	1	0	0	0	0	0	1	3	2	3	3	3	3	3	2	2	2	3	3	4	4	4	4	4	3	3
35	1	2	2	1	2	1	1	1	1	0	1	0	0	0	0	0	0	0	0	0	1	3	2	3	3	2	3	2	4	3	4	5	5	4	4	4	3	4	4	4
48	1	2	2	1	2	1	1	2	1	0	1	0	0	0	0	0	0	0	0	0	1	1	1	1	1	1	1	1	3	1	3	1	2	4	3	4	4	5	4	4
42	1	2	2	2	2	1	1	1	2	0	0	0	1	1	1	0	0	0	0	0	1	2	2	3	3	3	3	3	3	3	5	4	5	4	3	3	3	4	4	4
54	1	2	2	5	2	2	2	2	3	0	0	0	1	1	1	0	0	0	0	0	1	1	2	2	3	2	2	4	3	4	4	4	3	4	4	4	4	2	3	4
36	1	2	2	1	2	1	2	2	1	0	0	0	0	0	0	0	1	0	0	0	1	2	2	2	2	3	4	4	3	3	4	4	4	4	4	4	4	5	5	5
42	1	2	2	1	2	1	1	1	3	0	0	0	0	0	0	0	1	0	0	0	1	3	2	3	3	3	3	3	3	3	4	5	5	5	4	4	3	5	5	5
35	1	2	2	2	2	2	1	2	3	0	0	1	1	0	1	0	0	0	0	0	1	1	2	2	2	3	2	2	3	4	4	2	4	3	3	3	3	4	4	4
41	1	2	2	4	2	1	1	1	3	0	0	0	1	1	1	0	0	0	0	0	1	3	3	3	3	3	3	3	4	3	4	3	5	4	5	4	4	5	5	5
39	1	2	2	2	2	2	3	2	1	0	0	0	1	1	1	0	0	0	0	0	1	3	2	3	2	2	3	3	4	1	5	2	3	3	4	4	4	4	4	5
37	1	2	1	5	2	1	1	1	3	0	0	0	1	1	1	0	0	0	0	0	1	2	3	3	3	2	3	3	4	4	5	4	5	4	4	4	4	4	4	4
40	1	2	2	2	2	1	2	1	3	0	1	0	0	0	0	0	0	0	0	0	1	2	2	2	3	3	2	2	3	1	4	5	5	4	4	4	4	5	4	4
53	1	2	2	5	2	1	2	2	2	0	0	0	0	0	0	0	0	0	1	0	1	2	2	2	3	3	2	1	4	4	4	4	3	4	4	4	4	4	4	4
47	1	2	2	5	2	2	1	2	3	0	0	0	0	1	1	0	0	0	0	0	1	2	3	2	3	2	4	4	5	3	3	5	5	5	4	4	3	4	4	4
32	1	2	2	2	2	2	1	2	3	0	1	0	0	0	0	0	0	0	0	0	1	2	2	2	2	3	3	4	4	4	2	2	2	4	4	4	4	4	4	4
33	1	2	2	5	2	2	2	2	2	0	0	0	0	0	0	1	1	0	0	0	1	2	3	2	2	3	3	2	2	2	3	2	3	3	2	3	4	3	3	2
45	1	2	2	5	2	2	1	1	3	0	0	1	1	0	1	1	0	0	0	0	1	2	2	3	3	3	3	4	5	4	5	5	5	5	5	4	4	5	5	4
26	1	2	1	2	2	1	1	2	3	0	0	1	0	0	1	0	0	0	0	0	1	3	3	3	3	3	4	3	3	4	4	3	4	4	3	3	4	3	3	3
34	1	2	2	2	2	1	1	1	1	0	0	0	1	1	1	0	0	0	0	0	1	1	2	2	3	3	3	3	4	2	5	2	5	4	4	4	4	5	5	5
52	1	2	2	5	2	3	2	2	3	0	0	0	1	0	1	0	1	0	0	0	1	2	2	3	3	3	3	3	3	2	3	4	4	4	4	4	4	4	3	3
43	1	2	2	5	2	2	1	2	3	0	0	0	1	1	1	0	0	0	0	0	1	2	2	2	3	3	2	3	3	3	3	2	2	3	4	3	3	4	4	5
42	1	2	2	1	2	1	1	2	3	0	0	0	1	1	1	0	0	0	0	0	1	1	2	2	2	3	2	3	5	2	4	1	4	4	4	4	4	4	4	4
40	1	2	2	1	2	1	1	1	3	0	0	0	1	1	1	0	0	0	0	0	1	3	2	3	3	3	3	3	3	3	3	3	3	3	3	4	4	4	4	3
35	1	2	4	2	2	2	2	2	2	0	0	1	1	0	1	0	0	0	0	0	1	1	2	2	2	2	2	3	4	3	3	2	4	2	3	3	3	3	4	3
24	2	2	1	2	2	2	3	1	3	0	0	0	1	1	1	0	0	0	0	0	1	3	3	3	2	3	3	5	5	4	5	4	5	4	4	4	4	4	4	5
24	2	2	1	2	2	1	1	1	2	0	0	0	0	0	0	0	0	0	0	1	1	1	2	2	2	3	2	2	5	4	5	4	5	4	5	5	4	4	4	5
37	1	2	2	1	2	1	1	1	2	0	0	0	0	0	0	0	1	0	0	0	1	3	3	2	3	3	5	5	5	5	5	2	3	4	4	4	4	4	4	5
50	1	2	2	1	2	1	1	1	3	0	1	0	0	0	0	0	0	0	0	0	1	2	3	2	2	3	4	1	1	2	3	3	4	4	3	4	3	4	3	3
39	1	2	2	1	2	1	1	2	3	0	0	1	0	0	1	0	0	0	0	0	1	1	2	2	2	3	2	2	4	4	4	4	4	4	4	4	3	2	2	3
43	1	2	2	5	2	1	1	1	1	0	0	1	1	0	1	0	0	0	0	0	1	2	3	2	3	2	3	3	3	3	4	3	3	3	4	4	4	3	3	3
47	1	2	4	2	2	2	2	1	3	0	1	0	1	1	1	0	0	0	0	0	1	3	3	3	3	3	3	3	4	2	4	4	4	3	4	4	3	2	3	3
44	1	2	2	2	2	2	1	1	3	0	1	0	0	0	0	0	0	0	0	0	1	3	2	3	2	3	2	2	3	2	3	3	3	3	4	4	3	4	4	4
40	1	2	4	2	2	1	1	1	2	0	1	0	0	0	0	0	0	0	0	0	1	2	3	2	3	3	2	4	3	3	3	4	5	4	4	4	4	4	4	4
33	1	2	1	5	2	2	1	1	3	0	1	0	0	0	0	0	0	0	0	0	1	2	3	3	3	3	3	3	4	4	3	4	5	4	1	3	2	5	5	5
39	1	2	2	2	2	1	1	2	3	0	1	0	0	0	0	0	0	0	0	0	1	2	2	2	3	2	3	1	4	3	2	2	4	4	3	4	4	4	5	5
31	1	2	2	2	2	2	1	1	1	1	0	0	0	0	0	0	0	0	0	0	1	2	2	3	3	3	2	3	3	3	3	3	5	1	3	3	3	5	5	5
29	1	2	1	5	2	1	1	1	3	1	0	0	0	0	0	0	0	0	0	0	1	3	3	3	3	3	3	3	4	3	3	3	4	4	3	3	3	5	5	4
29	1	2	2	5	2	1	1	1	3	1	0	0	0	0	0	0	0	0	0	0	1	3	3	3	3	3	3	3	4	3	4	4	4	4	4	3	3	4	4	5
32	1	2	4	2	2	2	1	1	2	1	1	0	0	0	0	0	1	0	0	0	1	2	3	3	2	2	2	4	4	4	5	5	5	5	4	4	4	4	4	4
33	1	2	2	1	2	2	1	2	3	1	0	1	0	0	1	0	0	0	0	0	1	3	3	3	3	3	3	3	3	3	3	3	5	4	3	3	3	5	5	4
29	2	2	1	2	2	2	2	2	2	1	0	0	0	0	0	0	0	0	0	0	1	2	3	3	3	3	3	3	4	2	3	3	3	3	4	4	3	4	4	4
43	1	2	2	1	2	2	1	1	2	1	0	0	0	0	0	0	0	0	0	0	1	2	3	3	3	3	3	3	3	3	3	3	3	4	3	3	3	2	2	3
31	1	2	1	2	2	2	1	1	2	1	0	0	0	0	0	0	0	0	0	0	1	2	3	3	3	3	3	3	4	4	4	1	2	2	3	3	3	2	3	3
39	1	2	2	2	2	3	1	1	3	1	0	0	0	1	1	0	0	0	0	0	1	3	3	2	3	3	3	2	4	4	4	2	2	2	1	2	3	4	4	5
45	1	2	2	5	2	1	1	1	3	1	0	1	0	0	1	0	0	0	0	0	1	2	3	3	3	3	5	3	4	3	5	4	5	4	3	3	3	5	4	4
45	1	2	2	5	2	1	1	1	3	1	0	0	0	0	0	0	0	0	0	0	1	1	2	2	2	1	2	2	3	1	3	2	4	4	3	3	3	4	4	3
43	1	2	4	1	2	1	1	1	1	1	0	0	0	0	0	0	0	0	0	0	1	2	3	3	3	3	3	3	3	3	3	3	3	3	2	2	2	3	3	3
45	1	2	1	5	2	1	1	1	2	1	0	0	0	0	0	1	0	0	0	0	1	2	3	4	3	3	2	2	4	4	4	5	5	5	4	4	4	5	5	5
39	1	2	2	1	2	1	1	2	2	1	0	0	0	0	0	0	0	0	0	0	1	2	1	2	2	3	3	4	3	4	5	4	5	5	4	4	3	4	5	4
46	1	2	2	5	2	2	2	2	2	1	0	0	0	0	0	0	0	0	0	0	1	2	2	3	3	3	3	3	4	3	3	4	4	4	3	3	3	4	4	4
40	1	2	2	1	2	2	1	2	3	1	0	0	0	0	0	0	0	0	0	0	1	2	2	2	3	3	3	3	4	4	4	3	4	4	3	3	3	4	4	4
40	1	2	2	1	2	2	1	1	3	1	0	0	0	0	0	0	0	0	0	0	1	3	3	4	3	3	2	4	5	5	5	3	4	3	4	3	3	4	4	3
46	1	2	2	1	2	2	1	1	1	1	0	0	0	0	0	0	0	0	0	0	1	2	3	2	3	3	3	4	5	4	5	4	5	4	3	2	2	4	4	4
38	1	2	2	1	2	1	1	1	3	1	0	0	0	0	0	0	0	0	0	0	1	2	3	3	3	3	3	4	3	4	3	4	4	4	4	4	4	4	4	4
47	1	2	2	1	2	1	1	1	2	1	0	0	0	0	0	0	0	0	0	0	1	2	3	4	3	3	3	4	4	5	5	5	5	4	3	3	3	5	5	5
24	1	2	1	2	2	2	2	2	2	1	0	0	0	0	0	0	0	0	0	0	1	3	3	3	3	3	2	2	3	3	3	2	4	3	2	3	2	4	5	4
38	1	2	2	2	2	2	2	2	3	1	0	0	0	0	0	0	0	0	0	0	1	2	2	3	3	2	2	2	4	2	4	2	4	3	3	3	3	4	4	4
35	1	2	4	5	2	2	1	1	1	1	0	0	0	0	0	0	0	0	0	0	1	2	3	3	3	2	2	2	4	5	5	4	5	5	4	3	4	5	5	5
44	1	2	2	3	2	2	1	1	3	1	0	0	1	0	1	0	0	0	0	0	1	3	3	3	2	3	3	4	5	4	5	2	3	3	3	3	2	2	4	4
39	1	2	2	1	2	1	1	1	3	1	0	0	0	0	0	0	0	0	0	0	1	2	3	3	3	3	3	3	4	3	3	3	3	3	3	3	3	4	4	4
47	1	2	2	1	2	1	1	1	2	1	0	0	0	0	0	0	0	0	0	0	1	1	1	1	2	3	3	4	4	2	4	3	4	3	2	2	2	3	3	3
52	1	2	4	1	2	1	1	2	3	1	0	0	0	0	0	0	0	0	0	0	1	2	2	4	3	2	2	2	4	2	4	4	4	3	2	2	2	2	2	2
25	2	2	1	2	2	2	1	1	1	1	0	0	0	0	0	0	0	0	0	0	1	1	2	3	3	2	3	4	3	4	4	3	3	3	3	3	3	2	3	3
34	1	2	2	2	2	2	2	1	3	1	0	0	0	0	0	0	1	0	0	0	1	2	2	3	3	3	3	3	5	3	3	3	4	4	3	3	3	5	5	4
42	1	2	2	1	2	2	2	2	3	1	0	0	0	0	0	0	0	0	1	0	1	2	3	2	2	3	2	2	3	4	4	2	4	2	3	3	3	1	1	2
44	1	2	2	5	2	2	1	1	2	1	0	0	0	0	0	0	0	0	0	0	1	3	3	2	3	3	3	3	4	3	5	3	5	4	4	3	3	4	4	4
45	1	2	2	4	2	1	1	1	2	1	0	0	0	0	0	0	1	0	0	0	1	2	2	3	3	2	3	4	5	3	4	4	5	4	4	4	4	4	4	4
32	1	2	1	2	2	2	1	2	2	1	0	0	0	0	0	0	0	0	1	0	1	2	2	3	4	3	4	4	4	4	5	4	4	2	3	3	4	4	4	4
33	1	2	4	5	2	2	1	1	3	1	0	0	0	0	0	0	0	0	0	0	1	2	3	3	3	3	4	2	4	5	3	5	5	5	4	3	3	4	4	4
25	1	2	2	5	2	2	1	1	1	1	0	0	0	0	0	0	1	0	0	0	1	3	2	3	3	3	3	4	4	2	5	4	4	4	3	3	3	4	4	4
41	1	2	2	1	2	2	1	1	3	1	0	0	0	0	0	0	0	0	0	0	1	3	3	3	3	3	3	3	4	2	4	3	4	3	4	4	4	5	5	4
47	1	2	2	2	2	1	1	2	3	1	0	0	0	0	0	0	0	0	0	0	1	1	2	2	3	3	3	3	5	3	4	2	4	3	3	3	3	5	5	5
34	1	2	4	2	2	2	2	1	2	1	0	0	0	0	0	0	1	0	0	0	1	2	3	3	2	2	3	4	4	3	4	5	5	3	4	3	3	2	4	4
38	1	2	2	4	2	1	1	1	2	1	0	0	0	0	0	0	1	0	0	0	1	3	2	4	4	4	4	4	4	4	4	5	5	5	4	4	3	4	4	5
34	1	2	2	1	2	1	1	2	3	1	0	0	0	0	0	0	0	0	0	0	1	1	2	2	3	2	2	3	3	2	2	2	4	3	3	3	3	3	4	4
44	1	2	2	1	2	2	2	2	2	1	0	0	0	0	0	0	0	0	0	0	1	3	2	3	2	2	2	5	5	4	5	2	2	1	1	1	2	3	4	3
29	1	2	2	2	2	1	1	1	2	1	0	0	0	0	0	0	0	0	0	0	1	2	3	3	3	3	2	3	4	5	4	4	5	4	4	4	4	4	4	4
45	1	2	2	5	2	1	1	1	3	1	0	1	0	0	1	0	0	0	0	0	1	2	3	2	3	2	1	4	3	3	4	3	4	3	3	3	3	3	4	3
34	1	2	2	1	2	1	1	1	1	1	0	0	1	1	1	0	0	0	0	0	1	1	3	2	3	3	5	4	3	2	3	4	5	4	3	3	3	4	5	4
36	1	2	2	2	2	2	1	2	3	1	0	0	0	0	0	0	0	0	0	0	1	2	2	2	3	3	2	2	4	2	4	3	3	2	2	4	4	3	3	3
41	1	2	3	2	2	2	2	1	2	1	0	0	0	0	0	0	0	0	0	0	1	2	3	3	3	3	3	3	3	3	3	4	5	4	3	3	3	4	4	4
38	1	2	2	2	2	2	2	2	2	1	0	0	0	0	0	0	0	0	0	0	1	3	2	3	2	2	1	4	5	3	2	3	3	4	3	3	3	5	3	2
47	1	2	2	4	2	1	1	1	3	1	1	0	0	0	0	0	1	0	0	0	1	3	3	3	3	4	4	4	3	4	4	4	5	4	4	4	4	4	5	5
34	1	2	2	2	2	2	2	1	3	1	0	0	0	0	0	0	1	0	0	0	1	3	3	3	3	3	3	3	3	3	3	3	5	4	3	3	4	3	3	3
35	1	2	2	1	2	1	1	2	1	1	0	0	0	0	0	0	0	0	0	0	1	1	2	2	2	3	3	2	4	3	3	3	4	3	4	4	4	2	2	2
41	1	2	2	1	2	2	2	2	3	1	0	0	0	0	0	0	0	0	0	0	1	2	3	3	3	3	4	4	3	3	4	1	3	2	3	3	3	3	3	3
35	1	2	2	1	2	2	2	2	3	1	0	0	0	0	0	0	0	0	0	0	1	2	3	3	3	3	4	3	4	3	4	4	4	4	3	3	3	4	5	5
23	1	2	2	5	2	2	1	1	2	1	0	0	0	0	0	0	1	0	0	0	1	2	2	3	3	4	3	4	4	3	5	3	5	3	3	3	2	4	3	3
39	1	2	2	2	2	1	1	1	2	1	1	0	0	0	0	0	0	0	0	0	1	3	2	3	3	4	4	4	5	4	5	3	5	4	4	4	3	5	5	5
35	1	2	3	2	2	2	2	2	2	1	0	0	0	0	0	0	0	0	0	0	1	1	2	2	2	2	2	1	2	1	3	2	4	4	4	4	4	4	4	4
42	1	2	2	5	2	1	2	2	3	1	1	0	0	0	0	0	0	0	0	0	1	1	2	3	4	4	4	4	5	4	5	4	5	4	4	4	4	5	5	5
44	1	2	2	5	2	1	1	2	2	1	0	0	0	0	0	0	0	0	0	0	1	1	1	2	2	3	4	3	3	3	3	4	5	4	3	3	3	4	5	5
32	1	2	2	5	2	1	1	1	2	1	0	0	0	0	0	0	1	0	0	0	1	2	3	3	3	4	3	3	4	3	4	3	5	4	4	4	4	5	5	4
33	1	2	2	2	2	1	1	1	3	1	0	0	1	0	1	0	0	0	0	0	1	3	2	2	3	2	3	4	3	3	4	4	2	4	4	4	3	5	5	4
24	1	2	1	5	2	2	2	2	1	1	0	1	0	0	1	0	0	0	0	0	1	2	3	2	3	3	2	3	4	2	4	1	2	2	3	4	3	2	1	2
28	1	2	1	5	2	1	1	1	3	1	0	0	0	0	0	0	0	0	0	0	1	1	2	2	2	2	2	2	3	1	3	3	4	4	3	4	4	3	3	3
29	1	2	4	5	2	2	1	1	3	1	0	0	0	0	0	0	0	0	0	0	1	2	2	3	3	3	3	3	3	3	3	3	3	4	3	3	3	3	3	3
47	1	2	2	5	2	1	1	1	3	1	0	0	0	0	0	0	0	0	0	0	1	2	3	3	3	3	3	3	4	3	4	4	5	5	4	4	5	5	4	4
24	1	2	1	2	2	1	1	1	2	1	0	0	0	0	0	0	0	0	0	0	1	2	4	3	3	3	2	4	4	4	4	4	4	4	4	4	3	5	4	4
25	2	2	1	2	2	1	1	1	3	1	0	0	0	0	0	0	0	0	0	0	1	3	1	4	3	3	3	4	4	4	4	3	5	4	4	3	3	4	4	4
32	1	2	2	1	2	1	1	1	2	1	0	0	0	0	0	0	0	0	0	0	1	2	2	3	3	3	5	3	4	3	3	3	4	4	4	4	4	4	5	5
43	1	2	2	1	2	2	2	2	1	1	0	0	0	0	0	0	0	0	0	0	1	2	1	2	2	2	2	2	2	1	3	2	4	4	4	4	4	3	3	3
24	2	2	1	2	2	2	1	1	1	1	0	1	0	0	1	0	0	0	0	0	1	2	3	3	3	3	3	3	4	4	4	2	3	3	3	3	3	4	4	4
31	1	2	2	2	2	1	1	1	1	1	0	0	0	0	0	0	0	0	0	0	1	2	3	3	2	3	2	3	4	3	3	4	5	3	4	4	3	4	4	4
35	1	2	2	3	2	1	1	1	3	1	0	0	0	0	0	0	0	0	0	0	1	2	2	2	2	2	2	1	5	2	4	5	5	3	4	4	4	4	4	3
49	1	2	2	2	2	2	2	1	3	1	0	0	0	0	0	0	0	0	0	0	1	2	4	3	2	3	2	2	3	2	4	4	4	4	3	3	3	3	3	3
45	1	2	2	1	2	3	2	1	2	1	1	0	0	0	0	0	0	0	0	0	1	1	3	3	3	3	3	2	4	4	4	5	5	4	3	3	3	3	3	4
23	1	2	1	5	2	2	1	2	3	1	0	0	0	0	0	0	0	0	0	0	1	2	2	3	3	3	3	3	3	4	3	3	3	2	3	3	3	2	2	2
43	1	2	2	2	2	2	1	2	3	1	0	0	0	0	0	0	0	0	0	0	1	2	3	2	3	3	3	4	3	4	3	4	3	4	3	3	3	4	5	3
33	1	2	2	2	2	1	1	1	1	1	0	0	0	0	0	0	0	0	0	0	1	2	3	3	3	3	2	4	4	4	5	3	4	3	3	3	2	4	5	5
34	1	2	4	2	2	1	1	1	3	1	0	0	0	0	0	0	0	0	0	0	1	2	2	2	3	3	3	2	5	2	5	3	5	3	3	3	3	4	4	4
42	1	2	2	2	2	1	1	1	2	1	0	0	0	0	0	0	0	0	0	0	1	3	3	3	3	3	4	5	5	5	5	5	5	4	3	4	3	5	5	5
18	2	2	1	2	2	2	1	1	3	1	0	0	0	0	0	0	0	0	0	0	1	3	4	3	3	3	2	1	4	2	3	2	3	4	4	3	3	4	4	4
33	1	2	2	2	2	1	2	2	3	1	0	0	0	0	0	0	0	0	0	0	1	1	2	1	1	1	2	4	5	4	5	1	2	1	1	1	1	2	2	2
30	1	2	4	2	2	1	1	1	1	1	0	0	0	0	0	0	0	0	0	0	1	2	2	2	2	2	2	2	4	2	4	2	2	2	2	2	3	3	3	3
39	1	2	2	2	2	3	1	2	3	1	0	0	0	0	0	1	0	0	0	0	1	2	3	2	3	3	3	3	4	3	4	2	4	3	3	3	3	4	4	4
33	1	2	4	2	2	2	1	1	3	1	0	1	0	0	1	0	0	0	0	0	1	2	3	2	3	3	2	3	5	5	5	4	5	4	4	4	4	5	5	5
41	1	2	2	1	2	2	2	2	1	1	0	0	0	0	0	0	0	0	0	0	1	1	2	2	2	3	2	2	4	1	3	3	3	4	3	3	3	4	4	3
32	1	2	2	2	2	1	1	1	3	1	0	0	0	0	0	0	0	0	0	0	1	2	3	2	3	5	2	1	4	1	4	3	5	4	5	4	4	5	4	4
46	1	2	2	1	2	1	1	2	3	1	1	0	0	0	0	0	0	0	0	0	1	2	1	3	1	2	1	3	4	3	3	3	3	3	3	3	3	4	4	4
40	1	2	2	2	2	2	1	1	1	1	0	1	0	0	1	0	0	0	0	0	1	2	3	3	3	4	3	4	4	3	5	4	4	3	3	3	3	4	4	4
34	1	2	2	1	2	1	1	1	1	1	0	1	0	0	1	0	0	0	0	0	1	3	2	2	2	3	3	5	4	5	4	4	5	5	4	3	4	5	5	5
31	1	2	2	5	2	2	1	1	3	1	0	0	0	0	0	0	0	0	0	0	1	2	3	1	3	3	2	2	5	5	4	5	5	4	4	4	4	5	4	5
34	1	2	2	1	2	1	1	1	3	1	0	0	1	1	1	0	0	0	0	0	1	2	2	2	2	2	3	4	4	2	4	4	5	4	5	4	4	4	5	4
28	1	2	1	2	2	2	1	2	3	1	0	0	0	0	0	0	0	0	0	0	1	3	3	3	3	3	3	3	4	3	4	2	3	3	3	4	4	3	4	4
44	1	2	2	4	2	1	1	1	1	1	0	1	0	0	1	0	1	0	0	0	1	1	2	2	3	2	2	4	3	4	3	3	4	3	4	4	3	4	4	4
48	1	2	4	4	2	2	1	2	3	1	0	0	0	0	0	0	0	0	0	0	1	2	3	3	2	2	2	3	4	4	4	3	5	4	4	4	4	4	4	3
37	1	2	2	1	2	1	1	1	3	1	0	0	1	1	1	0	0	0	0	0	1	2	3	2	3	3	3	3	4	4	4	2	3	4	3	3	3	4	4	4
34	1	2	2	1	2	1	1	1	2	1	0	0	0	0	0	0	0	0	0	0	1	2	2	3	3	3	3	3	5	3	5	4	4	4	4	4	4	4	4	5
49	1	2	4	5	2	2	1	2	2	1	0	0	0	0	0	0	0	0	0	0	1	2	1	2	2	3	2	4	3	2	3	4	4	4	4	4	4	4	4	4
41	1	2	2	1	2	1	1	1	3	1	0	1	0	0	1	0	0	0	0	0	1	2	2	3	3	2	2	3	3	3	3	4	5	4	4	4	4	4	4	4
36	1	2	4	5	2	1	1	1	2	1	0	0	0	0	0	0	0	0	0	0	1	2	2	2	3	3	3	4	4	4	4	4	5	5	3	4	4	4	4	4
34	1	2	2	2	2	2	1	1	1	1	0	1	0	0	1	0	0	0	0	0	1	2	2	2	3	3	2	3	4	1	3	3	3	4	4	4	4	2	3	4
29	1	2	1	2	2	2	1	1	3	1	0	0	0	0	0	0	0	0	0	0	1	2	3	1	3	3	2	3	4	4	4	3	5	4	3	3	4	5	5	5
35	1	2	4	2	2	2	2	2	1	1	0	0	0	0	0	0	0	0	0	0	1	2	3	3	3	3	4	4	4	3	4	4	5	4	3	3	3	4	4	4
26	1	2	1	5	2	1	1	1	3	1	0	0	1	0	1	0	0	0	0	0	1	3	2	3	2	3	3	3	3	3	4	2	3	3	3	4	3	4	5	5
22	2	2	1	1	2	1	1	1	1	1	0	0	0	0	0	0	0	0	0	0	1	2	2	3	3	3	3	3	3	3	3	3	5	3	3	4	4	4	4	3
33	1	2	2	2	2	1	1	1	3	1	0	0	0	0	0	0	0	0	0	0	1	1	2	3	3	3	3	4	5	4	5	4	5	4	3	3	3	5	5	3
28	1	2	2	2	2	1	1	1	2	1	1	0	0	0	0	0	0	0	0	0	1	2	2	2	3	3	3	1	4	1	4	3	5	4	3	3	3	2	5	3
37	1	2	2	1	2	2	2	2	3	1	0	1	1	0	1	0	0	0	0	0	1	2	2	1	3	3	2	4	3	4	4	2	3	4	4	4	4	4	4	4
42	1	2	3	1	2	1	1	1	2	1	0	0	0	0	0	0	0	0	0	0	1	1	2	2	2	1	1	2	4	2	4	3	3	3	3	3	3	4	4	4
33	1	2	1	2	2	1	1	1	1	1	0	0	0	0	0	0	0	0	0	0	1	1	3	2	3	3	3	2	4	4	3	4	5	4	4	4	4	5	5	5
45	1	2	2	1	2	1	1	1	1	1	0	0	0	0	0	0	0	0	0	0	1	2	3	2	3	2	3	4	3	3	3	4	5	4	3	3	3	3	5	5
39	1	2	2	5	2	2	1	1	1	1	0	0	0	0	0	0	0	0	0	0	1	2	2	2	3	3	3	3	4	4	3	3	4	4	4	4	4	4	4	4
27	2	2	1	2	2	2	1	1	1	1	0	0	0	0	0	0	0	0	0	0	1	2	3	3	2	3	2	3	4	4	5	2	3	4	4	4	4	4	4	3
32	1	2	2	1	2	1	1	1	3	1	0	0	0	0	0	0	0	0	0	0	1	1	1	1	1	3	2	3	3	3	3	3	3	4	3	3	3	4	4	4
35	1	2	2	1	2	1	1	1	3	1	0	0	0	0	0	0	0	0	0	0	1	1	2	2	2	3	1	4	1	5	2	2	4	2	4	4	3	3	3	3
24	2	2	1	2	2	3	1	2	2	1	0	0	0	0	0	0	0	0	0	0	1	2	3	1	2	3	3	3	3	4	3	4	5	4	4	4	4	3	3	3
38	1	2	2	1	2	1	2	2	3	1	0	0	0	0	0	0	0	0	0	0	1	3	2	2	2	2	3	3	3	4	3	4	3	4	3	3	3	4	4	3
36	1	2	4	5	2	1	1	1	2	1	0	0	0	0	0	0	0	0	0	0	1	1	1	2	2	3	1	3	3	3	3	1	1	2	3	3	2	2	3	2
43	1	2	2	2	2	2	2	2	3	1	0	0	0	0	0	0	0	0	0	0	1	2	3	4	4	4	4	4	4	4	4	5	5	5	3	4	4	5	5	5
33	1	2	1	2	2	2	2	2	3	1	0	0	0	0	0	0	0	0	0	0	1	2	2	2	2	3	2	2	4	2	3	2	4	2	4	4	4	4	4	3
31	1	2	4	5	2	1	1	1	2	1	0	0	0	0	0	0	0	0	0	0	1	2	2	3	3	3	3	3	5	2	3	3	3	3	2	3	4	5	5	5
28	1	2	1	5	2	2	1	2	2	1	0	0	0	0	0	0	0	0	0	0	1	3	3	3	3	3	4	4	3	4	3	5	4	4	4	4	4	4	4	4
51	1	2	3	5	2	2	2	2	2	1	0	1	0	0	1	0	1	0	0	0	1	1	2	2	2	2	3	3	3	4	3	4	3	4	4	4	4	4	4	4
36	1	2	2	2	2	1	1	1	2	1	0	0	0	0	0	0	0	0	0	0	1	2	3	4	3	3	3	4	4	4	2	5	5	4	4	4	4	4	3	4
44	1	2	2	2	2	1	1	2	2	1	0	1	1	0	1	0	1	0	0	0	1	3	2	2	3	3	3	3	3	3	3	3	4	4	4	4	4	4	4	4
41	1	2	2	1	2	1	1	1	3	1	0	0	0	0	0	0	0	0	0	0	1	2	3	2	2	2	4	4	4	4	4	5	5	5	5	5	5	5	5	4
31	1	2	2	3	2	2	2	2	3	1	0	1	0	0	1	0	0	0	0	0	1	2	2	3	3	4	3	3	4	3	4	5	5	5	4	3	4	4	3	3
42	1	2	2	2	2	2	1	2	3	1	0	0	0	0	0	1	0	0	0	0	1	2	3	3	3	3	3	3	3	2	3	3	4	3	3	3	3	3	3	3
28	1	2	1	2	2	1	1	1	2	1	0	1	0	0	1	0	0	0	0	0	1	1	3	3	3	3	4	2	3	3	5	4	5	5	4	4	4	4	4	4
32	1	2	2	2	2	1	1	1	1	1	0	0	0	0	0	0	1	0	0	0	1	2	2	2	3	3	5	2	1	4	4	4	5	5	3	4	3	5	5	5
53	1	2	2	5	2	1	1	2	1	1	0	0	0	0	0	0	0	0	0	0	1	1	2	1	2	3	2	4	3	4	4	2	3	4	4	4	4	5	5	4
51	1	2	2	5	2	2	1	1	3	1	0	0	0	0	0	1	1	0	0	0	1	2	2	2	2	2	2	1	2	1	4	2	4	3	2	4	2	3	3	3
49	1	2	2	1	2	2	2	2	3	1	0	0	0	0	0	0	0	0	0	0	1	2	3	3	3	3	4	3	3	3	2	4	3	4	4	4	4	4	4	4
54	1	2	2	1	2	2	2	2	2	1	0	0	0	0	0	0	1	0	0	0	1	2	2	2	2	3	2	2	2	2	3	4	5	4	4	4	3	3	3	3
37	1	2	4	2	2	1	1	1	3	1	0	0	0	0	0	0	1	0	0	0	1	3	2	3	3	3	4	4	4	3	3	4	5	3	4	3	4	5	5	5
45	1	2	2	3	2	2	1	1	1	1	1	1	1	0	1	0	0	0	0	0	1	2	3	3	2	2	1	2	2	5	3	2	2	4	3	4	4	4	4	4
44	1	2	2	1	2	1	1	1	1	1	0	0	0	0	0	0	0	0	0	0	1	3	3	3	3	3	3	3	4	3	4	3	4	3	4	3	3	4	4	4
33	1	2	4	2	2	1	1	1	3	1	0	0	0	0	0	0	0	0	0	0	1	3	3	2	3	3	3	4	3	3	4	4	5	4	4	3	4	5	4	4
39	1	2	2	2	2	2	1	2	2	1	1	0	0	0	0	0	0	0	0	0	1	2	2	3	3	3	3	3	3	3	3	3	3	4	4	5	4	3	3	3
52	1	2	3	1	2	2	2	2	2	1	0	0	1	0	1	0	1	0	0	0	1	3	3	3	3	4	4	3	2	3	3	2	3	3	2	3	2	3	3	3
42	1	2	2	3	2	2	1	1	2	1	1	0	0	0	0	0	0	0	0	0	1	2	3	3	3	3	3	2	4	3	4	3	4	4	4	4	4	5	5	5
38	1	2	4	1	2	2	1	2	3	1	0	0	0	0	0	0	0	0	0	0	1	2	2	2	2	2	2	2	3	4	4	5	5	5	4	4	4	4	4	4
47	1	2	2	1	2	1	1	2	1	1	0	0	0	0	0	0	0	0	0	0	1	2	3	2	2	3	3	3	3	3	5	3	4	3	4	4	3	5	5	5
36	1	2	2	1	2	1	1	1	1	1	0	0	0	0	0	0	0	0	0	0	1	3	2	3	3	3	3	1	3	2	3	4	5	4	4	4	4	5	5	5
39	1	2	2	1	2	1	1	1	3	1	0	1	0	0	1	0	0	0	0	0	1	2	3	3	3	3	3	3	4	3	5	4	5	4	4	4	4	5	5	5
43	1	2	2	1	2	1	1	1	1	1	0	0	0	0	0	0	0	0	0	0	1	1	2	2	3	3	2	3	4	5	3	2	3	4	4	3	4	3	4	3
50	1	2	2	1	2	1	2	2	3	1	0	0	0	0	0	0	0	0	0	0	1	2	2	2	3	3	2	2	4	2	3	2	5	4	4	4	4	4	4	3
34	1	2	2	5	2	1	1	2	1	1	0	0	0	0	0	0	0	0	0	0	1	3	2	3	3	3	3	3	3	3	3	4	4	4	4	4	4	4	4	3
30	1	2	4	5	2	1	1	1	3	1	0	0	0	0	0	0	0	0	0	0	1	2	3	3	3	3	3	4	4	4	5	4	5	5	4	4	3	5	4	3
26	1	2	2	2	2	2	2	2	1	1	0	0	0	0	0	0	0	0	0	0	1	1	3	3	2	3	3	3	3	3	3	3	4	5	4	4	4	4	3	3
52	1	2	2	5	2	1	1	1	2	1	0	0	0	0	0	0	0	0	0	0	1	2	2	2	2	3	3	3	3	2	5	3	3	4	4	4	4	3	3	3
47	1	2	2	4	2	1	3	1	1	1	1	0	0	0	0	0	1	0	0	0	1	2	1	1	1	1	2	2	4	2	4	1	2	1	1	1	1	4	4	4
50	1	2	2	5	2	1	1	1	2	1	0	0	0	0	0	0	0	0	0	0	1	3	3	3	3	3	3	2	3	2	3	3	3	3	4	4	4	4	4	5
31	1	2	2	2	2	1	1	1	2	1	0	0	0	0	0	0	0	0	0	0	1	3	2	4	3	3	3	4	3	4	4	4	5	5	4	4	4	5	5	5
38	1	2	2	2	2	2	2	2	1	1	0	0	0	0	0	0	0	0	0	0	1	3	3	3	3	3	3	3	3	3	3	3	5	2	3	3	4	4	4	4
42	1	2	2	1	2	2	1	2	1	1	0	0	0	0	0	1	1	0	0	0	1	2	2	1	2	3	2	2	4	3	5	5	5	5	5	5	5	5	5	5
46	1	2	2	5	2	1	1	1	1	1	0	0	0	0	0	0	0	0	0	0	1	2	3	4	3	3	4	2	3	1	4	4	5	5	5	5	5	5	5	5
42	1	2	2	5	2	1	1	1	2	1	0	0	1	1	1	0	0	0	0	0	1	3	3	3	3	3	3	4	4	4	4	4	5	4	4	4	4	4	4	4
39	1	2	4	2	2	2	2	2	1	1	0	0	0	0	0	0	1	0	0	0	1	3	3	3	3	3	3	3	4	3	4	3	5	1	3	3	4	4	4	3
38	1	2	2	1	2	2	2	2	1	1	0	0	0	0	0	0	0	0	0	0	1	2	3	3	3	3	3	4	4	3	3	4	3	3	3	3	3	2	2	3
37	1	2	2	1	2	1	1	1	1	1	0	0	0	0	0	0	0	0	0	0	1	3	2	3	2	3	3	4	2	3	2	3	5	5	2	3	3	5	5	5
33	1	2	2	2	2	1	1	1	1	1	0	0	0	0	0	1	1	0	0	0	1	3	2	3	3	3	3	3	3	3	3	3	3	4	4	4	4	3	3	3
